# Supplementary material for: Green multi-resonance thermally activated delayed fluorescence emitters containing phenoxazine units with highly efficient electroluminescence
Source: Royal Society of Chemistry journal article supplement (doi:10.1039/d1tc04595d), 2021-12-04
Supplement: d1tc04595d1.pdf [file d1tc04595d1.pdf]

## Supporting Information (SI)

### **Green multi-resonance induced thermally activated delayed fluorescence emitters containing phenoxazine units with highly efficient electroluminescence**

Jia-Jun Hu,<sup>1</sup> Xu-Feng Luo,<sup>1</sup> Yi-Pin Zhang,<sup>1</sup> Meng-Xi Mao,<sup>1</sup> Hua-Xiu Ni,<sup>1</sup> Xiao Liang,<sup>1</sup> and You-Xuan Zheng<sup>1,2\*</sup>

<sup>1</sup>State Key Laboratory of Coordination Chemistry, Collaborative Innovation Center of Advanced Microstructures, Jiangsu Key Laboratory of Advanced Organic Materials, School of Chemistry and Chemical Engineering, Nanjing University, Nanjing 210023, P. R. China. E-mail: yxzheng@nju.edu.cn.

<sup>2</sup>Shenzhen Research Institute of Nanjing University, Shenzhen 518057, P. R. China

### **Table of Contents**

- 1. General information**
- 2. Synthesis and Characterization**
- 3. Photophysical measurements**
- 4. Device fabrication and evaluation**
- 5. Supplementary figures**
- 6. Computational detail and geometry data**

## 1. General information

All reagents and anhydrous solvents were commercially available and used without further purification. NMR measurements were conducted on BRUKER AVANCE III 400 MHz spectrometer. Chemical shifts of  $^1\text{H}$  and  $^{13}\text{C}$ NMR signals were quoted to tetramethylsilane ( $\delta = 0.00$ ) and  $\text{CDCl}_3$  ( $\delta = 77.0$ ) as internal standards, respectively. Matrix-assisted laser desorption ionization time-of-flight (MALDI-TOF) mass spectra were collected on a Bruker Daltonics Autoflex III spectrometer using dithranol as the matrix. Thermogravimetric analysis (TGA) curves were performed on a METTLER TOLEDO TG/SF-1100 analyzer under a  $\text{N}_2$  atmosphere at a heating rate of  $10^\circ\text{C min}^{-1}$ . Cyclic voltammetry measurements were conducted on MPI-A multifunctional electrochemical and chemiluminescent system (Xi'an Remex Analytical Instrument Co. Ltd., China) at room temperature, with a polished Pt plate as the working electrode, platinum thread as the counter electrode and  $\text{Ag-AgNO}_3$  (0.1 M) in the solution ( $\text{CH}_3\text{CN}:\text{DCM}=1:1$ ) as the reference electrode, tetra-n-butylammonium perchlorate (0.1 M) was used as the supporting electrolyte, using  $\text{Fc}^+/\text{Fc}$  as the internal standard, the scan rate was 0.1 V/s. Absorption spectra were measured on a Shimadzu UV-3100 spectrophotometer and photoluminescence spectra were measured from a Hitachi F-4600 photoluminescence spectrophotometer. The absolute photoluminescence quantum yields (absolute PLQY were measured via an integrating sphere) of the compounds were measured with HORIBA Fluorolog-3 fluorescence spectrometer. The decay lifetimes of the compounds were measured with Edinburgh Instruments FLS980 spectrometer. The density functional theory (DFT) and the time-dependent density functional theory (TD-DFT) calculations at the B3lyp/6-31G(d) level with a solvent effect using the SMD model were performed by Gaussian 09. The computational geometry data were appended to the end of the Supporting Information.

Analysis of Rate Constants: The rate constants of radiative decay ( $k_{r,s}$ ) and nonradiative decay ( $k_{nr,s}$ ) from S1 to S0 states, the rate constants of intersystem crossing ( $k_{\text{ISC}}$ ) and reverse intersystem crossing ( $k_{\text{RISC}}$ ) were calculated from the following six equations:

$$k_p = 1/\tau_p \dots \dots \dots \text{Eq. (1)}$$

$$k_d = 1/\tau_d \dots \dots \dots \text{Eq. (2)}$$

$$k_{r,S} = \Phi_p k_p + \Phi_d k_d \approx \Phi_p k_p \dots \dots \dots \text{Eq. (3)}$$

$$k_{nr,S} = \frac{1 - \Phi_{PL}}{\Phi_{PL}} k_{r,S} \dots \dots \dots \text{Eq. (4)}$$

$$k_{ISC} = k_p - k_{r,S} - k_{nr,S} \dots \dots \dots \text{Eq. (5)}$$

$$k_{RISC} = (k_p k_d \Phi_d) / (k_{ISC} \Phi_p) \dots \dots \dots \text{Eq. (6)}$$

The  $\tau_p$  and  $\tau_d$  represent the prompt and decay fluorescence lifetime, which determined from transient PL spectra. The  $k_p$  and  $k_d$  represent the decay rate constants for prompt and delayed fluorescence, respectively.  $\Phi_p$  and  $\Phi_d$  indicate prompt and delayed fluorescence components and can be distinguished from the total  $\Phi_{PL}$  by comparing the integrated intensities of prompt and delayed components in the transient PL spectra. <sup>1</sup>

**References**

1. H. Tao, Z. Lisi, L. Nengquan, H. Zhongyan, C. Xiaosong, X. Zhengqi, S. Gong, C. Zhou, C. Zhong and C. Yang, *Chem. Eng. J.* 2021, **426**.131169-131177.

## 2. Synthesis and Characterization

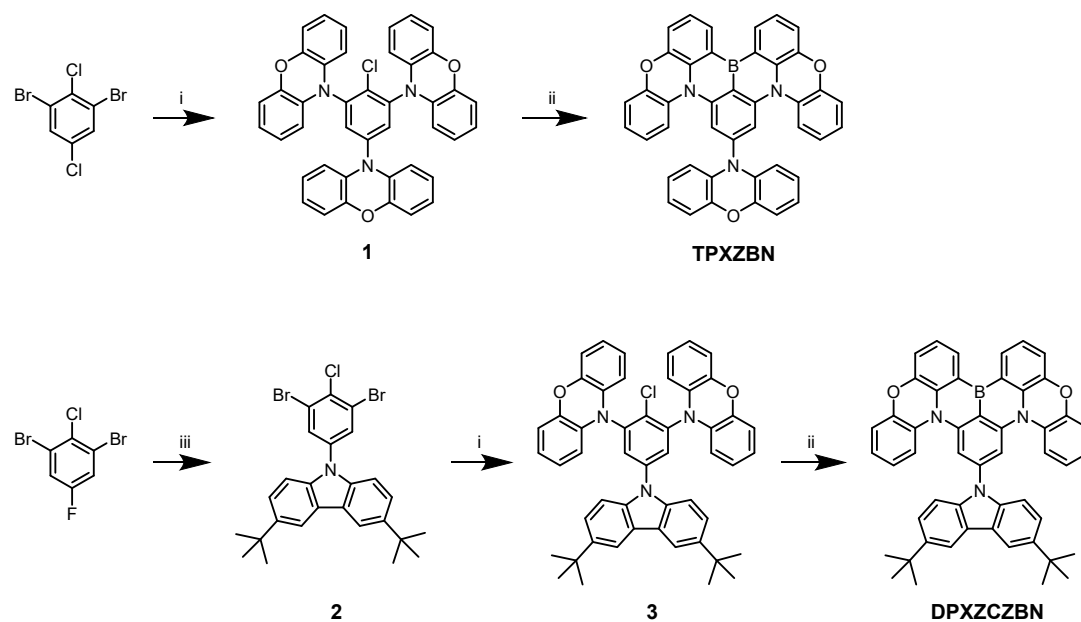

**Scheme S1** Synthetic procedure of the precursors and compounds: i) 1. *t*-BuLi, *t*-BuPh, 0 °C, 30 min, then 0 °C, 2 h; 2. BBr<sub>3</sub>, -40 °C, 0.5 h, then RT, 0.5 h; 3. NEt(*i*-Pr)<sub>2</sub>, 0 °C, then 120 °C, 12 h. ii) Cs<sub>2</sub>CO<sub>3</sub>, DMF, 150 °C, 12 h; iii) Pd<sub>2</sub>(dba)<sub>3</sub>, SPhos, NaOtBu, toluene, 90 °C, 12 h.

**Synthesis of 1 (TPXZCl, 10,10',10''-(2-chlorobenzene-1,3,5-triyl)tris(10H-phenoxazine)):** 1,3-Dibromo-2,5-dichlorobenzene (4.8 g, 15.7 mmol) was added to a mixture of 10H-phenoxazine (6.4 g, 34.9 mmol), Pd<sub>2</sub>(dba)<sub>3</sub> (0.3 g, 0.3 mmol), 2-dicyclohexylphosphino-2',6'-dimethoxybiphenyl (SPhos, 1.0 g, 2.4 mmol), NaOtBu (5.3 g, 55.4 mmol) in toluene (150 mL) under a nitrogen atmosphere. After stirring at 90 °C for 12 h, the mixture was filtered with a pad of diatomite (eluent: dichloromethane). After evaporation, the mixture was purified by recrystallization from dichloromethane/hexane to afford **3** as white solid (yield = 2.6 g, 34%). <sup>1</sup>H NMR (400 MHz, Chloroform-*d*) δ 7.691 (s, 2H), 6.77-6.69 (m, 18H), 6.13-6.09 (m, 2H), 5.94-5.91 (m, 4H). <sup>13</sup>C NMR (101MHz, Chloroform-*d*) δ 144.27, 143.92, 141.86, 141.23, 138.96, 136.43, 133.19, 132.14, 123.55, 123.51, 122.56, 122.40, 116.23, 116.17, 113.14, 112.36.

**Synthesis of TPXZBN:** TPXZBN was synthesized according to the same procedure as for DPXZCZBN by using **3** (2.4 g, 3.6 mmol) instead **2** precursor. TPXZBN was obtained as yellow solid (yield = 0.4 g, 19%). <sup>1</sup>H NMR (400 MHz, Chloroform-*d*) δ 8.09 (d, *J* = 6.4 Hz, 2H), 7.63 (s, 2H), 7.49 (d, *J* = 7.6 Hz), 7.32-7.23 (m, 4H), 7.13 (dd, *J* = 1.6, 8 Hz, 2H), 7.09-7.05 (m, 2H), 6.97-6.93 (m, 2H), 6.74-6.66 (m, 6H), 6.17 (m, 2H). <sup>13</sup>C NMR (101 MHz, Chloroform-*d*) δ 149.38, 147.18, 144.02, 143.77, 136.83, 133.83, 130.61, 128.39, 126.24, 125.82, 123.72, 123.34, 122.06, 118.43, 117.86, 117.65, 115.53, 113.30, 109.42. HRMS (ESI): *m/z* [M+H]<sup>+</sup> Calcd. for C<sub>42</sub>H<sub>25</sub>BN<sub>3</sub>O<sub>3</sub>: 630.1897. Found 630.1983. Anal. Calcd for C<sub>42</sub>H<sub>25</sub>BN<sub>3</sub>O<sub>3</sub>: C, 80.14; H, 3.84; N, 6.68. Found: C, 79.32; H, 4.09; N, 6.26 (B and O are not analyzed by elemental analysis).

**Synthesis of 2 (BrClCz, 3,6-di-*tert*-butyl-9-(3,5-dibromo-4-chlorophenyl)-9*H*-carbazole):** 3,6-Di-*tert*-butyl-9*H*-carbazole (5.6 g, 20.0 mmol) and cesium carbonate (18.3 g, 56.0 mmol) were dissolved in DMF (110 mL) at room temperature under a nitrogen atmosphere. After stirring for 30 min, 1,3-dibromo-2-chloro-5-fluorobenzene (5.8 g, 20.0 mmol) was added to the solution. The mixture was stirred at 150 °C for 12 h. After cooling to room temperature, the reaction mixture was poured into a large amount of water. The product was extracted with dichloromethane for several times. The combined organic layer was dried with anhydrous MgSO<sub>4</sub>. After filtration and evaporation, the crude product was purified by column chromatography on silica gel (eluent: DCM/PE = 1:20, v/v) to afford **1** as white solid (yield = 5.3 g, 48%). <sup>1</sup>H NMR (400 MHz, Chloroform-*d*) δ 8.12(d, *J* = 1.6 Hz, 2H), 7.85 (s, 2H), 7.50 (dd, *J* = 2, 8.4 Hz, 2H), 7.35 (d, *J* = 8.8 Hz, 2H), 1.47 (s, 18H). <sup>13</sup>C NMR (101 MHz, Chloroform-*d*) δ 143, 138.44, 138.01, 130.42, 124.13, 124.04, 123.82, 116.51, 108.87, 34.78, 31.94.

**Synthesis of 3 (DPXZCICZ, 10,10'-(2-chloro-5-(3,6-di-*tert*-butyl-9*H*-carbazol-9-yl)-1,3-phenylene)bis(10*H*-phenoxazine)):** 3,6-Di-*tert*-butyl-9-(3,5-dibromo-4-chlorophenyl)-9*H*-carbazole (6.1 g, 11.1 mmol) was added to a mixture of 10*H*-phenoxazine (4.2 g, 23.3 mmol), Pd<sub>2</sub>(dba)<sub>3</sub> (0.5 g, 0.6 mmol), 2-dicyclohexylphosphino-2',6'-dimethoxybiphenyl (SPhos, 0.7 g, 1.7 mmol), NaOtBu (3.7 g, 38.6 mmol) in toluene (120 mL) under a nitrogen atmosphere. After stirring at 90 °C for 12 h, the mixture was filtered with a pad of diatomite (eluent:

dichloromethane). After evaporation, the crude product was purified by silica gel (eluent: DCM/PE = 1:10, v/v) to afford **2** as gray solid (yield = 5.1 g, 60%). <sup>1</sup>H NMR (400 MHz, Chloroform-*d*) δ 8.12 (d, *J* = 1.2 Hz, 2H), 7.92 (s, 2H), 7.51-7.44 (m, 4H), 6.78-6.72 (m, 12H), 6.05-6.01 (m, 4H), 1.44 (s, 18H). <sup>13</sup>C NMR (101 MHz, Chloroform-*d*) δ 144.29, 143.83, 140.83, 139.92, 137.93, 132.28, 130.55, 124.24, 124.12, 123.60, 122.27, 116.62, 116.07, 112.44, 108.88, 34.78, 31.88.

**Synthesis of DPXZCZBN:** A solution of *tert*-butyllithium in pentane (1.3 M, 18 mL, 23.4 mmol) was added slowly to a solution of **2** (3.9 g, 5.2 mmol) in *tert*-butylbenzene (200 mL) at 0 °C under a nitrogen atmosphere. After stirring at 60 °C for 2 h, pentane was removed in vacuo. After addition of boron tribromide (4.8 mL, 12.5 mmol) at -40 °C, the reaction mixture was stirred at room temperature for 30 min. *N,N*-Diisopropylethylamine (NEt(*i*-Pr)<sub>2</sub>, 14.8 mL, 20.0 mmol) was added at 0 °C and then the reaction mixture was allowed to room temperature. The reaction mixture was stirring at 120 °C for 12 h. After cooling to room temperature, the reaction mixture was poured into an aqueous solution of sodium bicarbonate. After filtration with a pad of diatomite (eluent: dichloromethane) and evaporation in vacuo, the mixture was purified by silica gel (eluent: Toluene/PE = 1:5, v/v) to afford crude product. After further purification with preparation thin liquid chromatography and recrystallization from DCM/methanol, **DPXZCZBN** was obtained as yellow solid (yield = 0.6 g, 15%). <sup>1</sup>H NMR (400 MHz, Chloroform-*d*) δ 8.15 (s, 2H), 8.07 (d, *J* = 7.6 Hz, 2H), 7.79 (s, 2H), 7.56 (d, *J* = 8 Hz, 2H), 7.51-7.46 (m, 4H), 7.26-7.21 (m, 4H), 7.10 (dd, *J* = 0.8, 8 Hz, 2H), 7.02 (t, *J* = 7 Hz, 2H), 6.90 (t, *J* = 8 Hz, 2H), 1.470 (s, 18H). <sup>13</sup>C NMR(101 MHz, Chloroform-*d*) δ 149.48, 147.33, 143.20, 142.81, 138.96, 137.00, 130.87, 128.40, 125.67, 123.69, 123.62, 118.65, 117.80, 117.55, 116.42, 116.39, 109.36, 106.20, 34.81, 31.99. HRMS (ESI): *m/z* [M+H]<sup>+</sup> Calcd. for C<sub>50</sub>H<sub>40</sub>BN<sub>3</sub>O<sub>2</sub>: 726.3286. Found 726.3291. Anal. Calcd for C<sub>42</sub>H<sub>25</sub>BN<sub>3</sub>O<sub>3</sub>: C, 82.75; H, 5.56; N, 5.79. Found: C, 82.50; H, 5.58; N, 5.64 (B and O are not analyzed by elemental analysis).

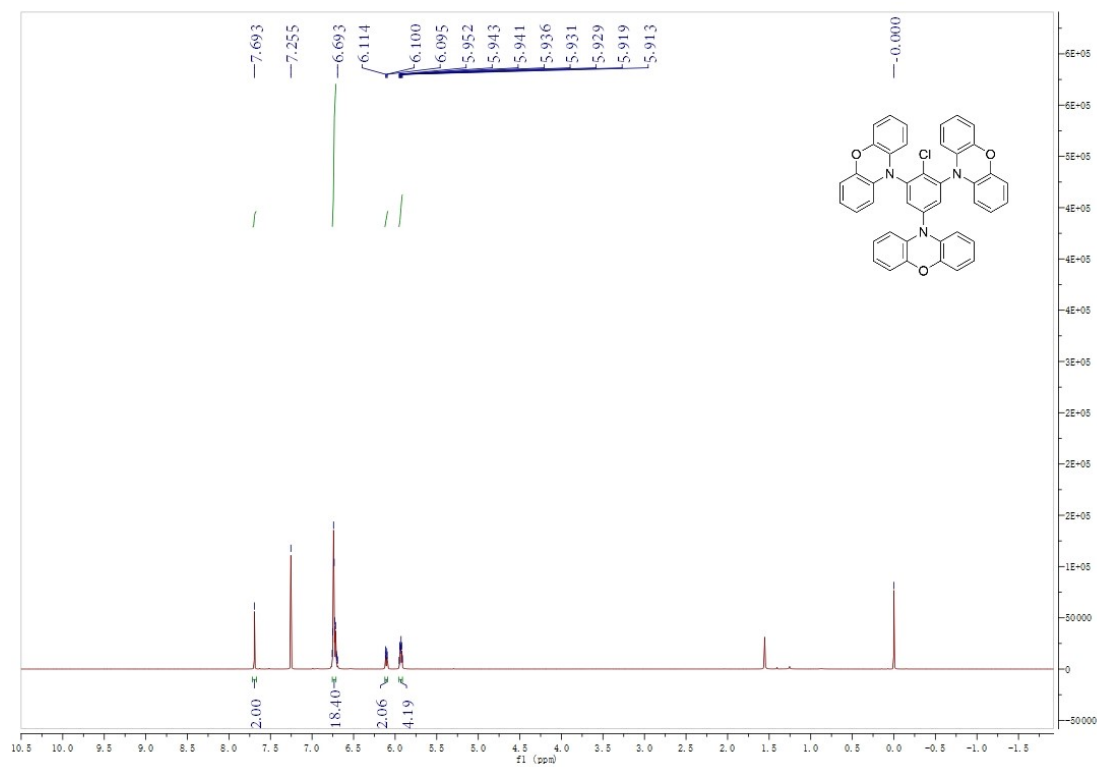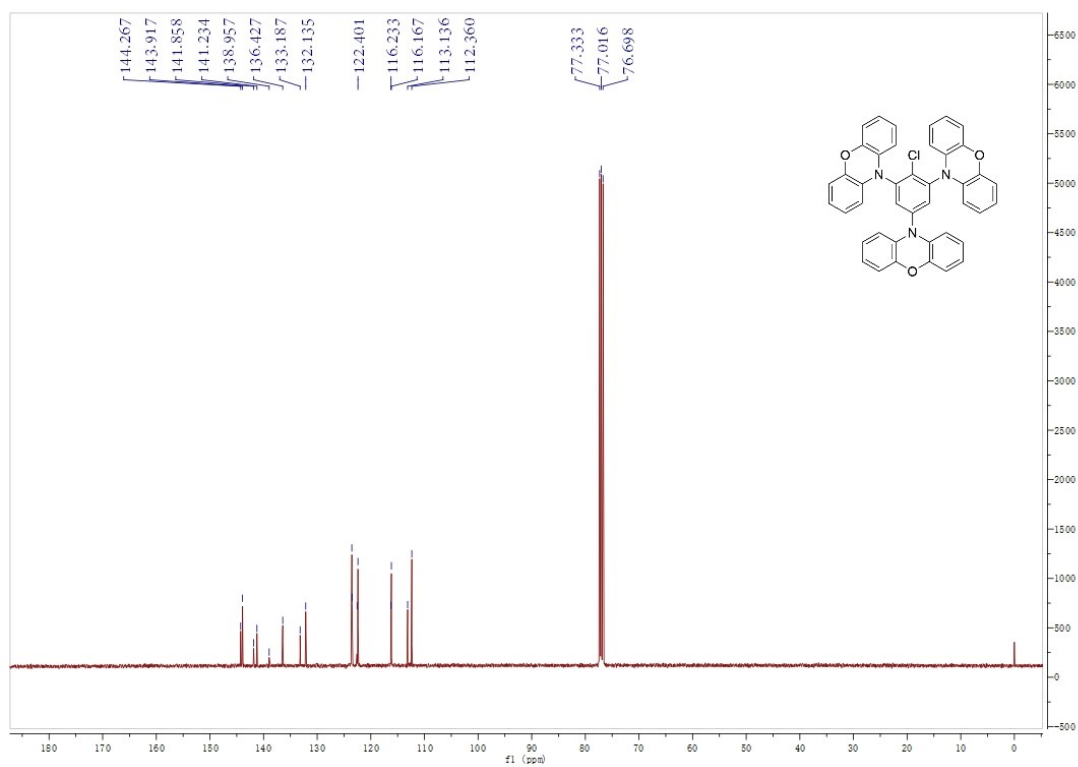

**Fig. S1** <sup>1</sup>H and <sup>13</sup>C NMR spectra of **1** (TPXZCl) in chloroform-*d*.

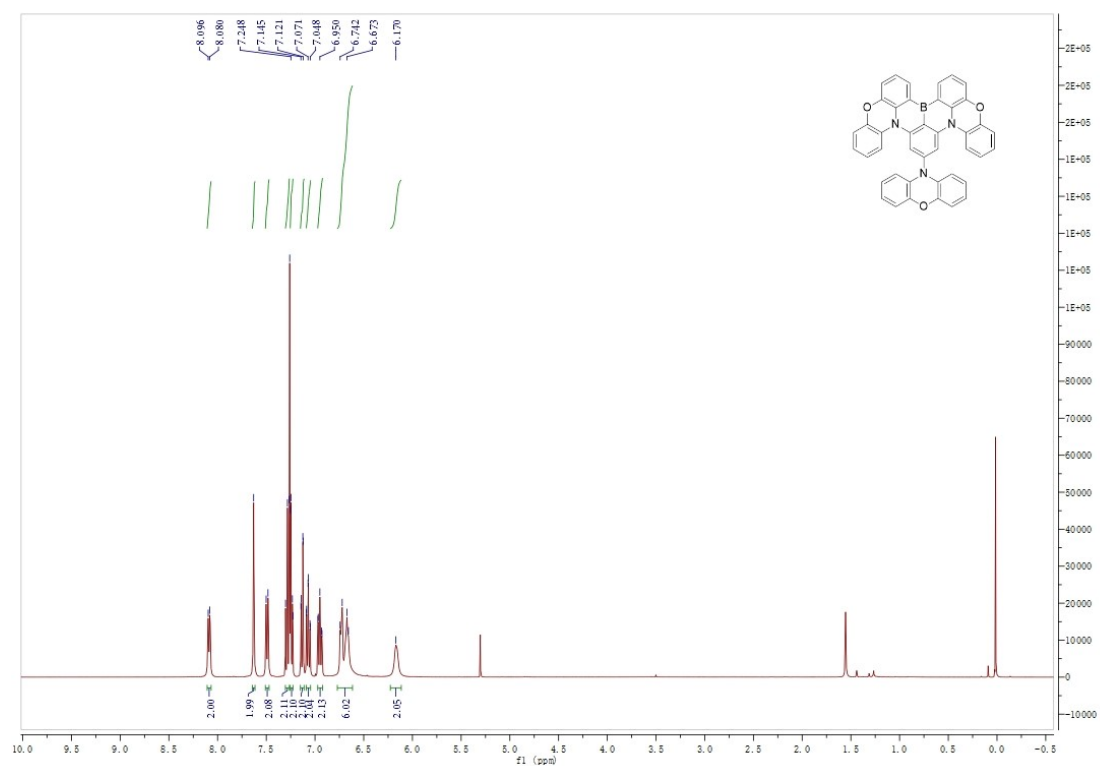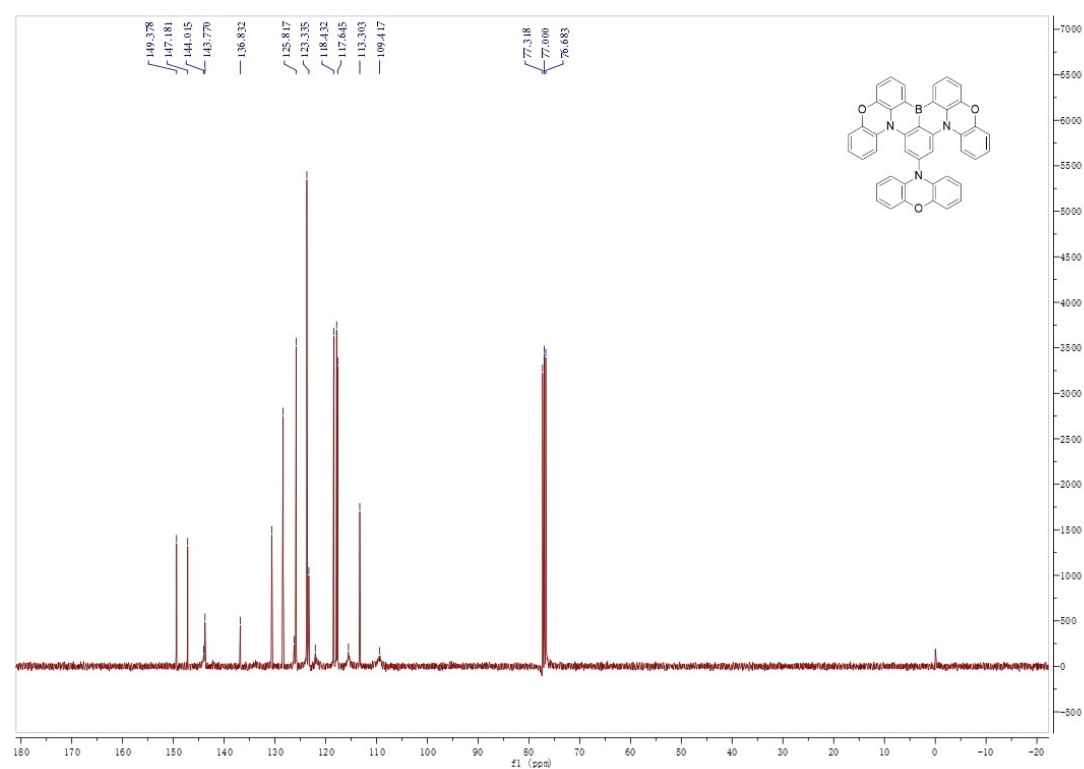

**Fig. S2** <sup>1</sup>H and <sup>13</sup>C NMR spectra of TPXZBN in chloroform-*d*.



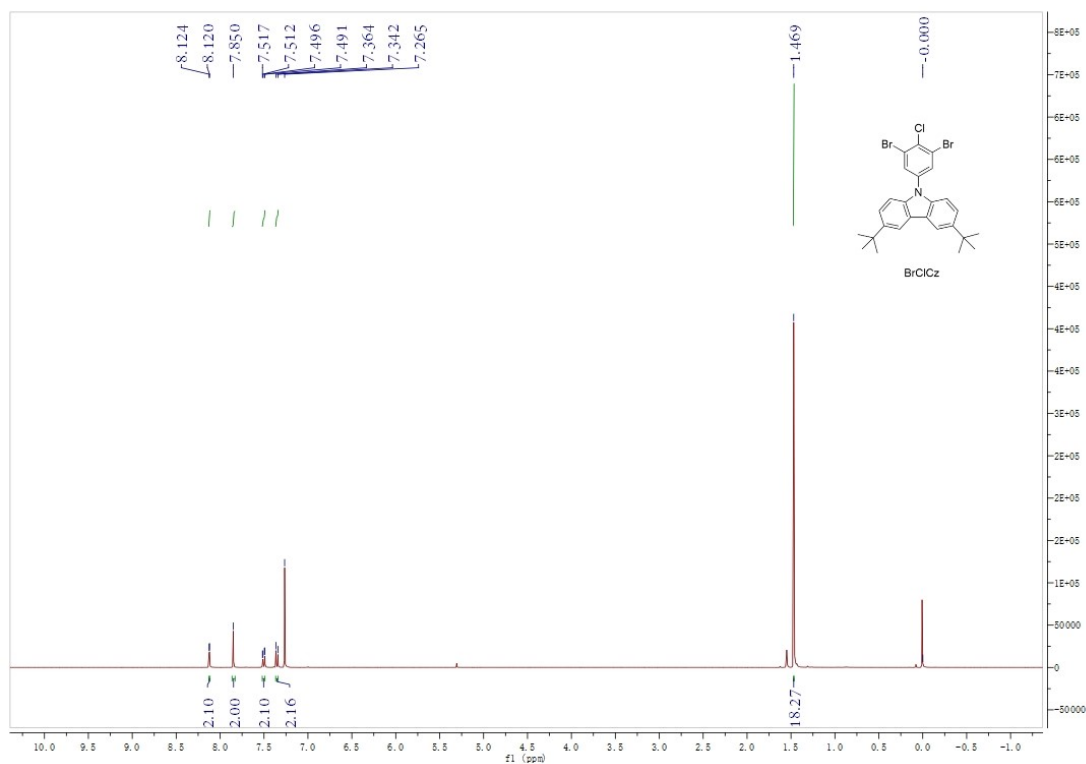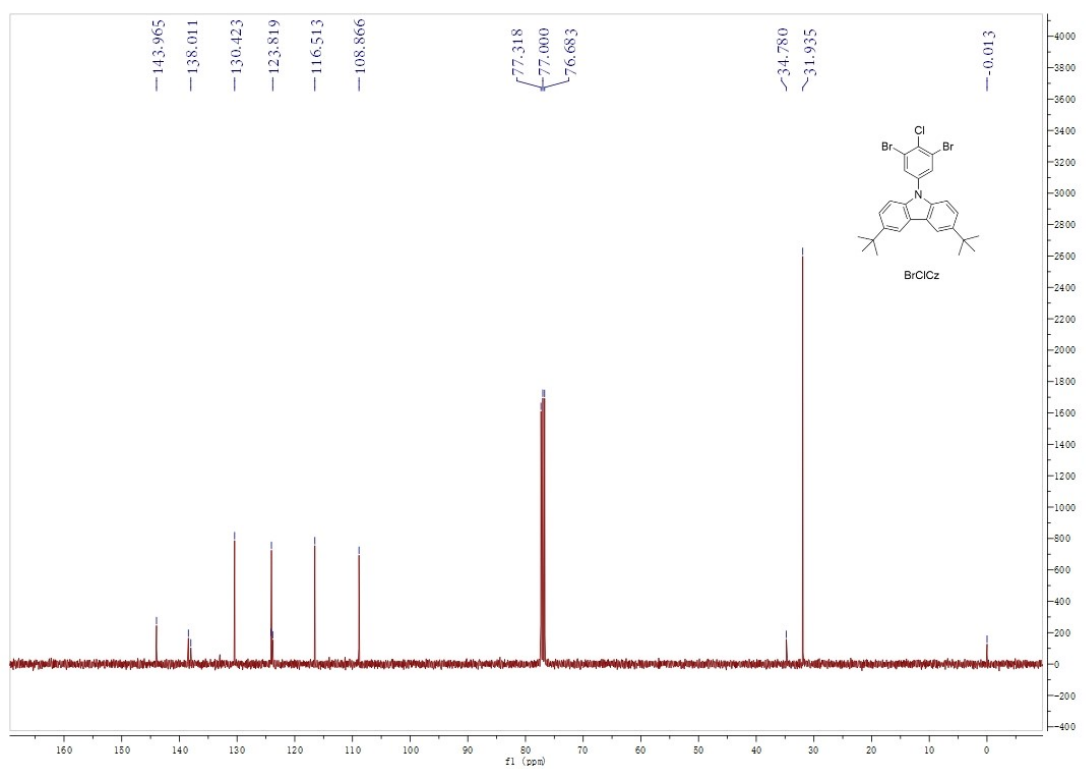

**Fig. S3** <sup>1</sup>H and <sup>13</sup>C NMR spectra of **2** (BrClCz) in chloroform-*d*.

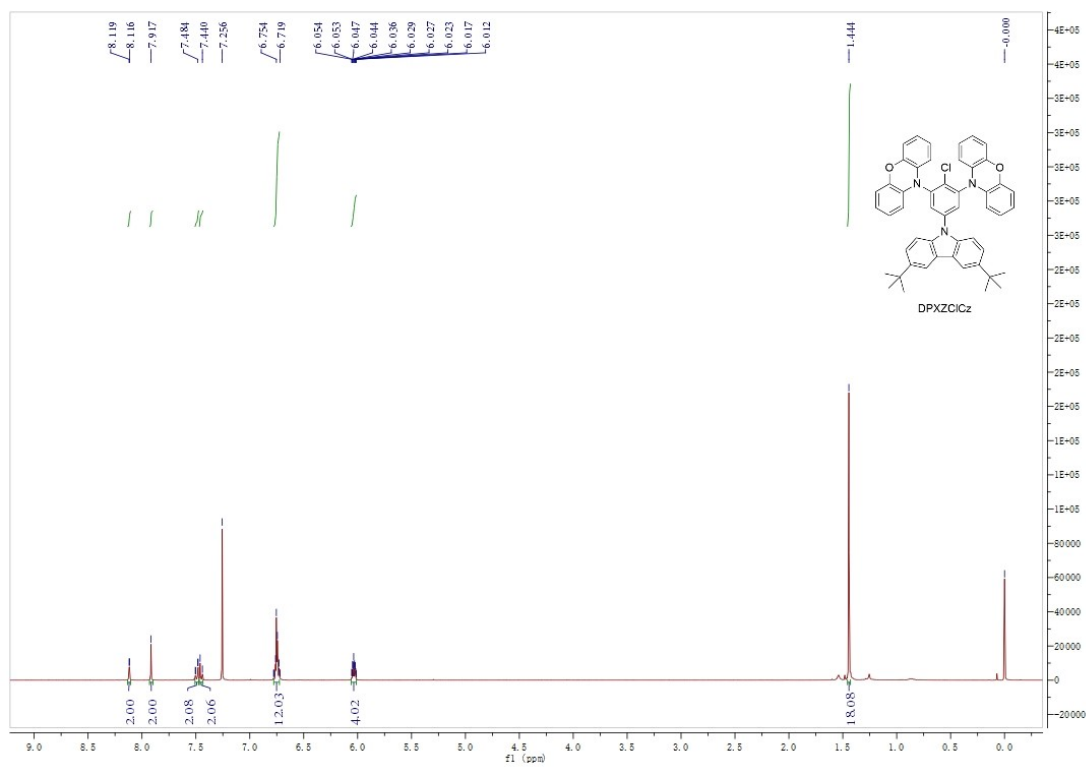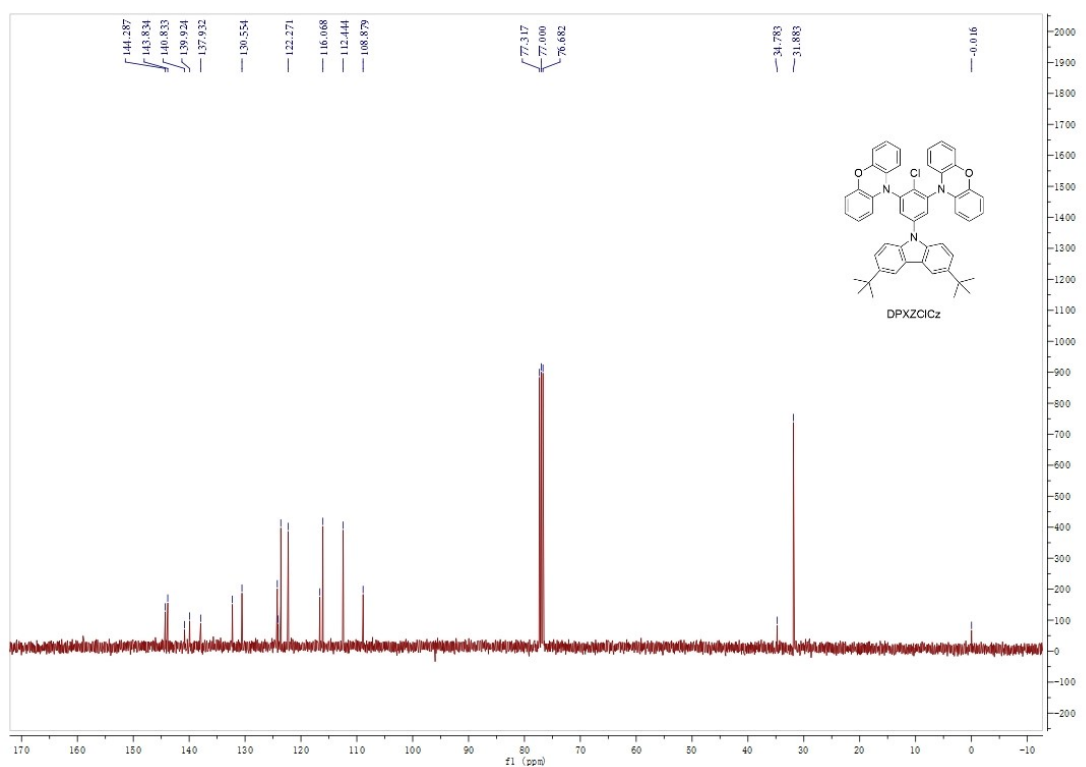

**Fig. S4** <sup>1</sup>H and <sup>13</sup>C NMR spectra of **3** (DPXZClCz) in chloroform-*d*.

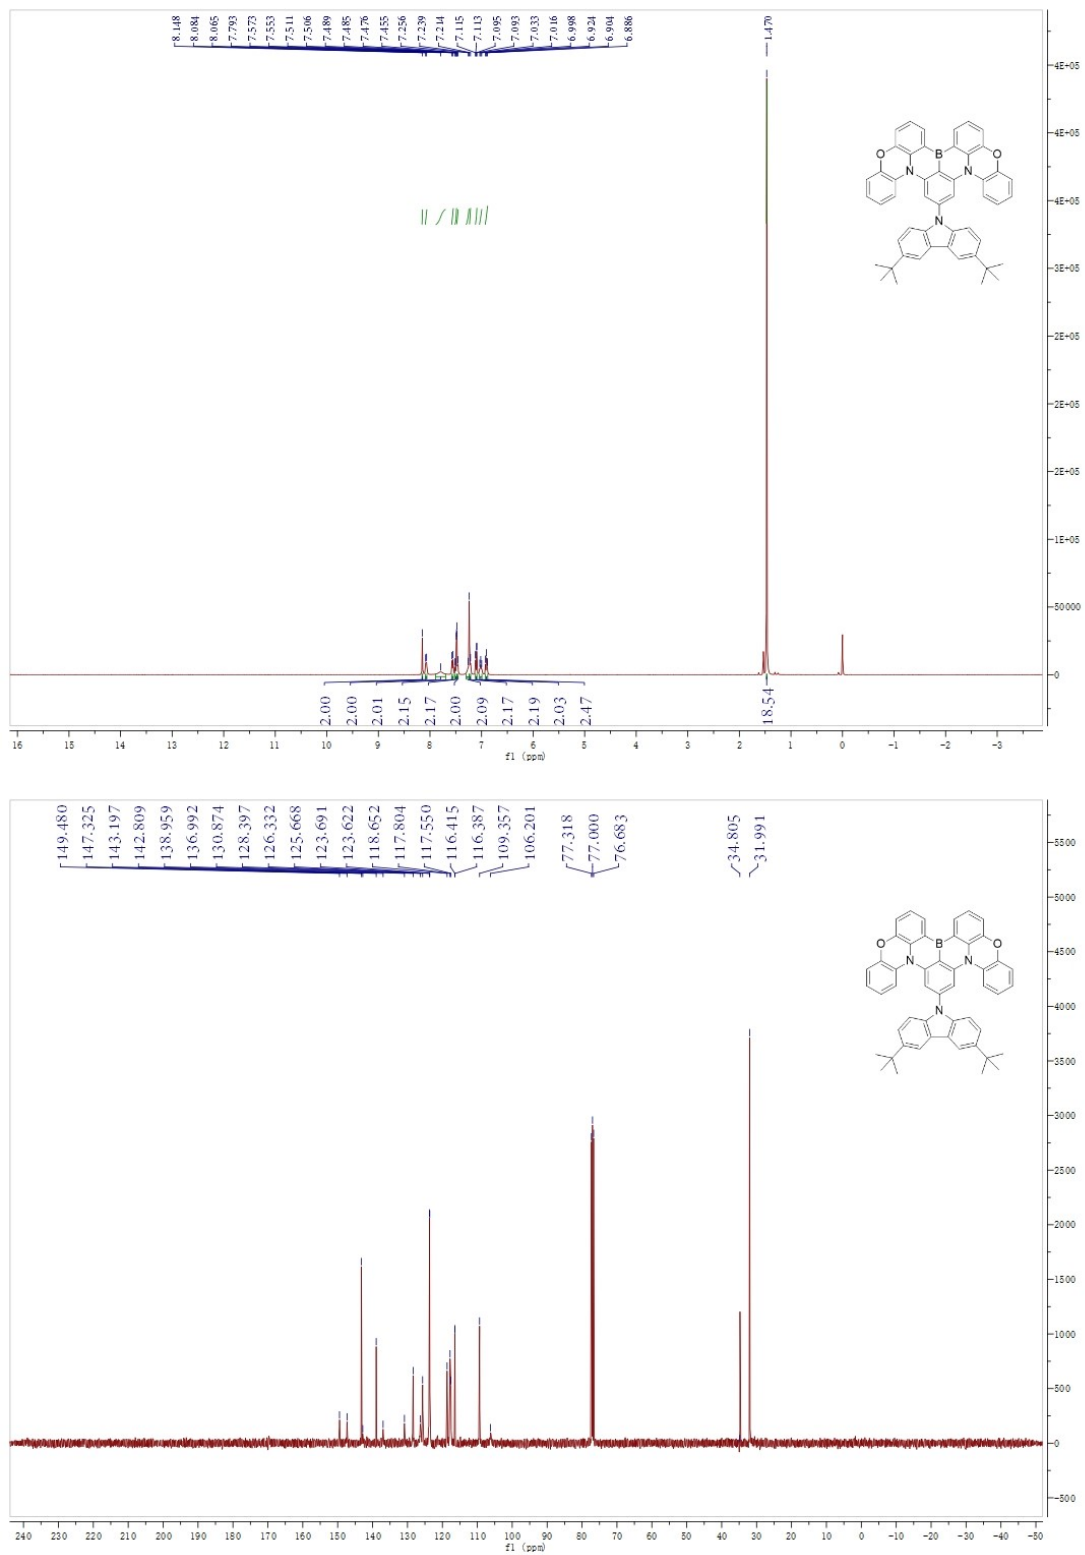

**Fig. S5**  $^1\text{H}$  and  $^{13}\text{C}$  NMR spectra of DPXZCZBN in chloroform-*d*.

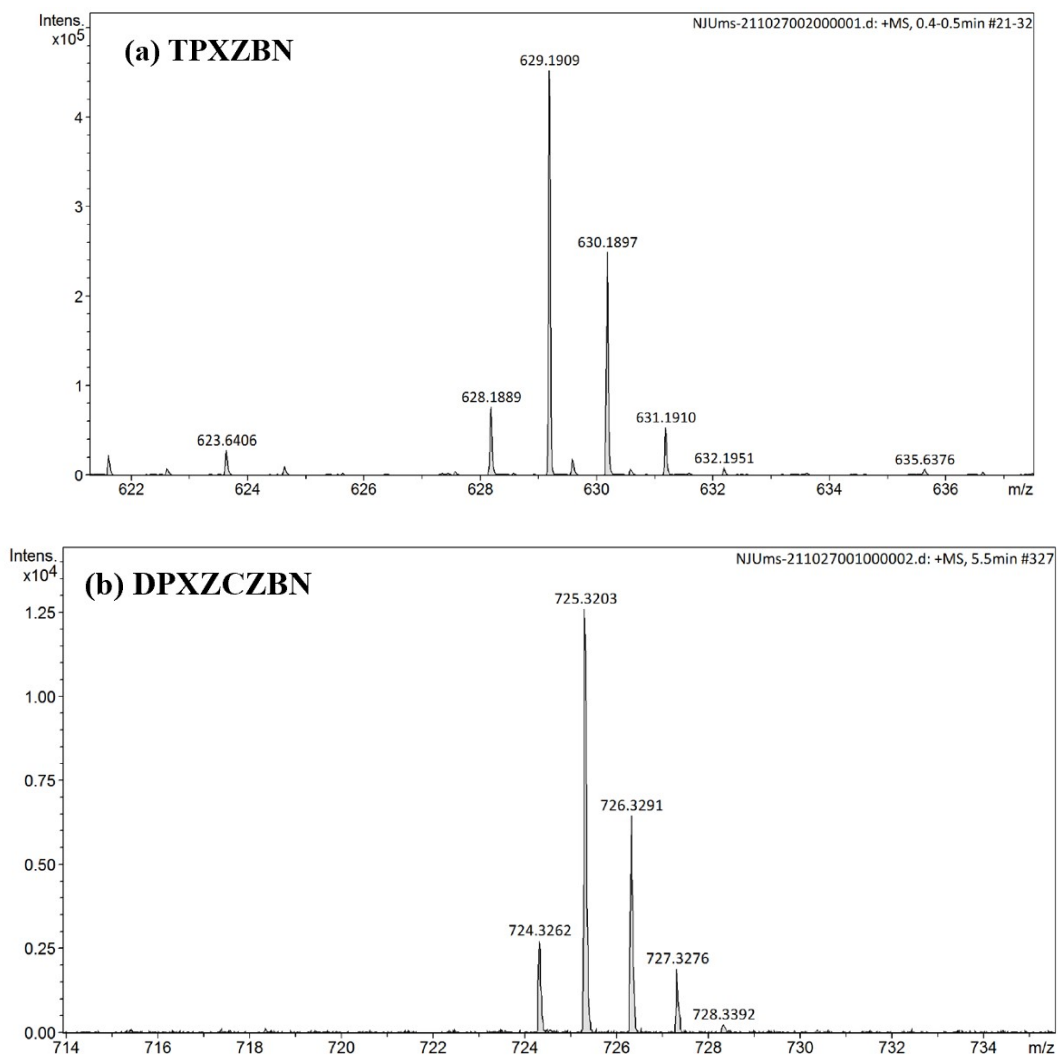

**Fig. S6** HRMS spectra of (a) TPXZBN and (b) DPXZCZBN compounds.

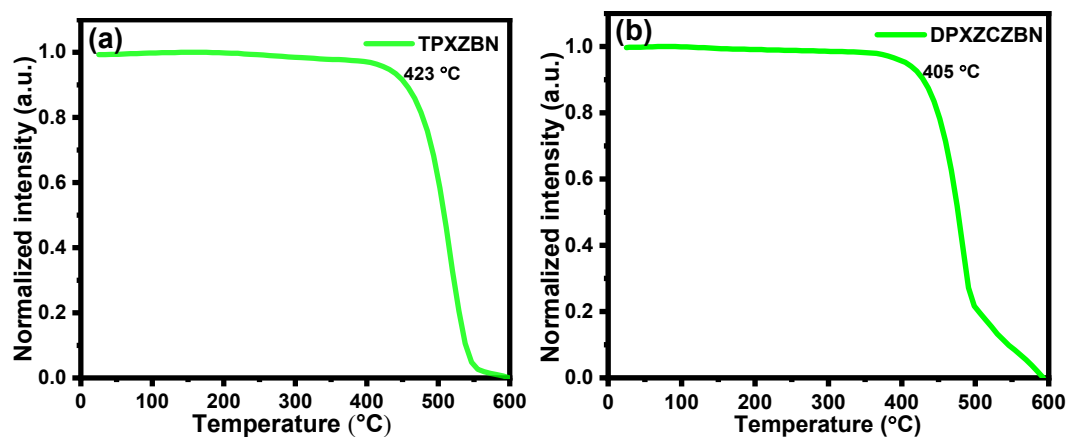

**Fig. S7** TGA thermogram curves of (a) TPXZBN and (b) DPXZCZBN at a heating rate of 10 °C min<sup>-1</sup> under N<sub>2</sub>.

### 3. Photophysical measurements

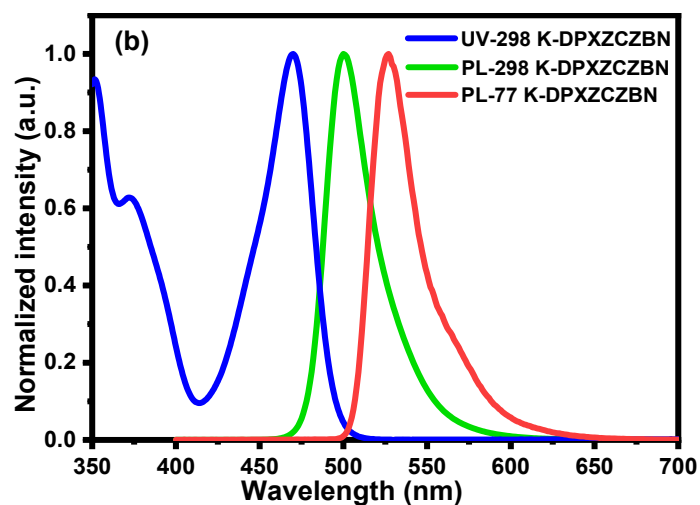

**Fig. S8** UV-vis absorption, fluorescence and phosphorescence (77 K) spectra of DPXZCZBN measured in toluene solutions ( $10^{-5}$  M).

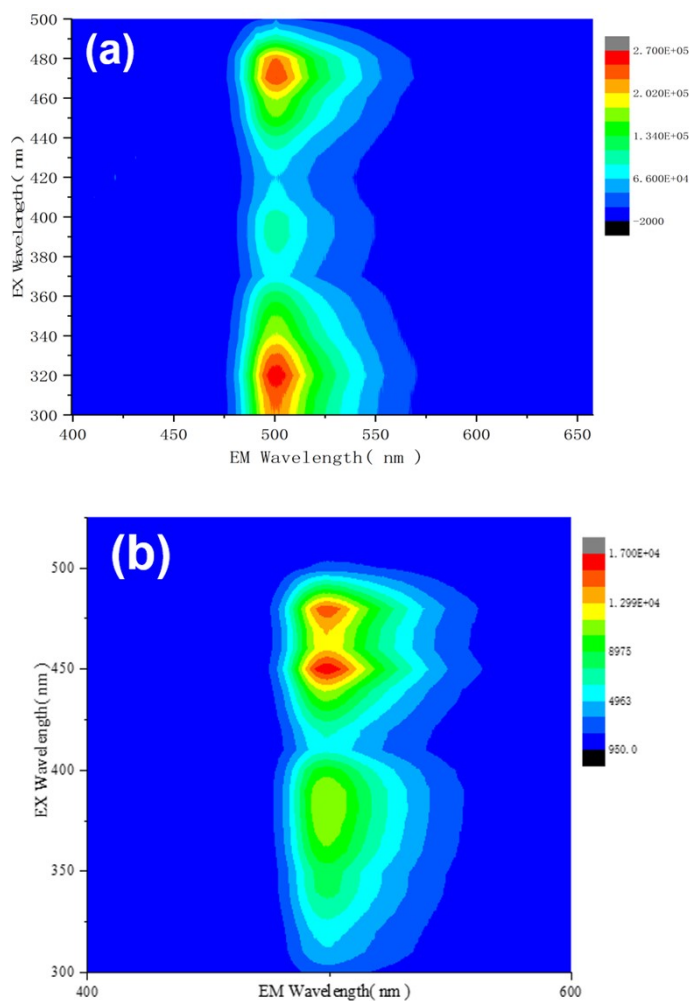

**Fig. S9** Three-dimensional fluorescence maps of (a) TPXZBN (b) DPXZCZBN at 298 K ( $10^{-5}$  M in toluene).

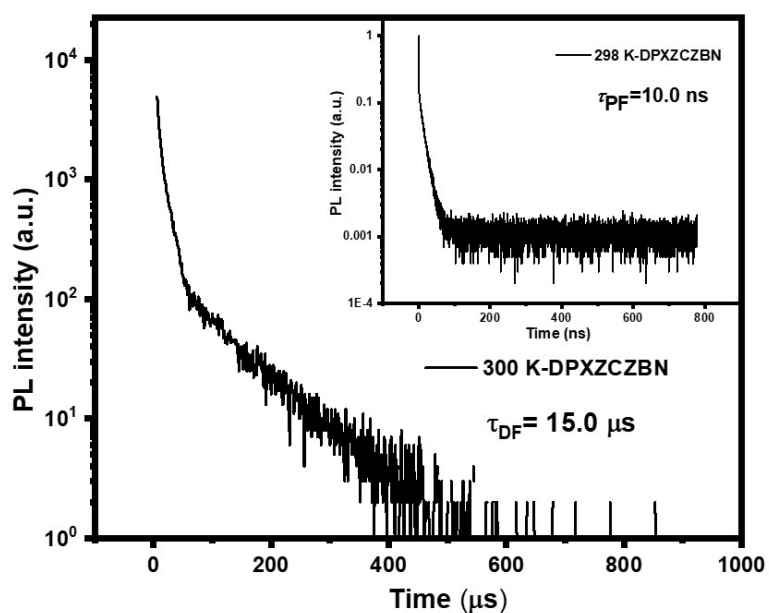

**Fig. S10** The delayed fluorescence lifetime curves of 5 wt% doping concentration of DPXZCZBN in mCBP deposited film.

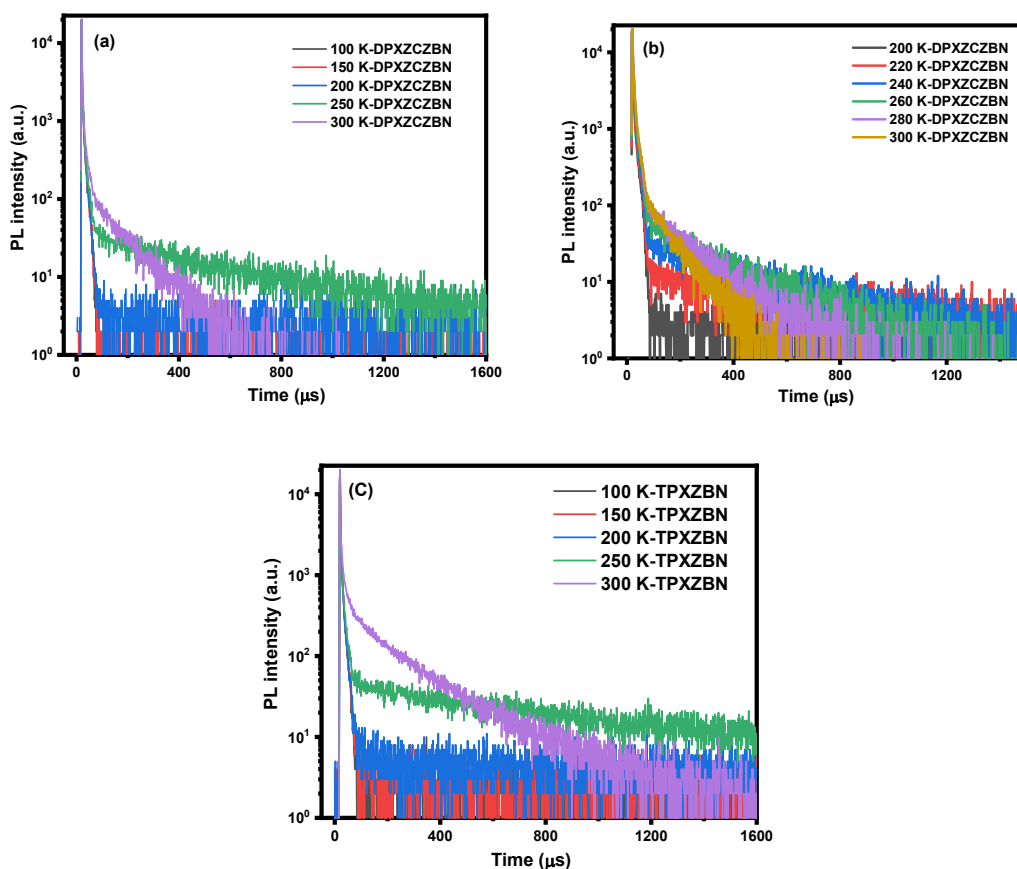

**Fig. S11** The delayed fluorescence lifetime curves of 5 wt% doping concentration of (a)(b) DPXZCZBN and (c) TPXZBN in mCBP deposited films at various temperatures.

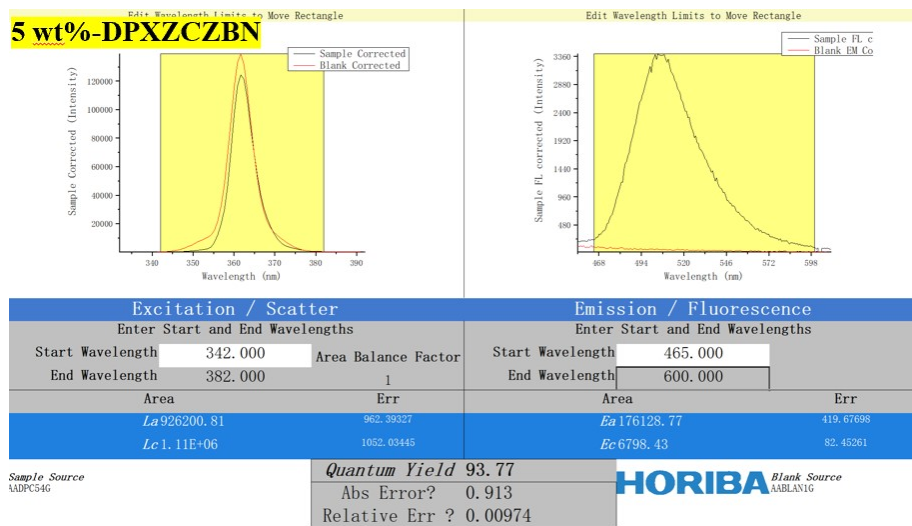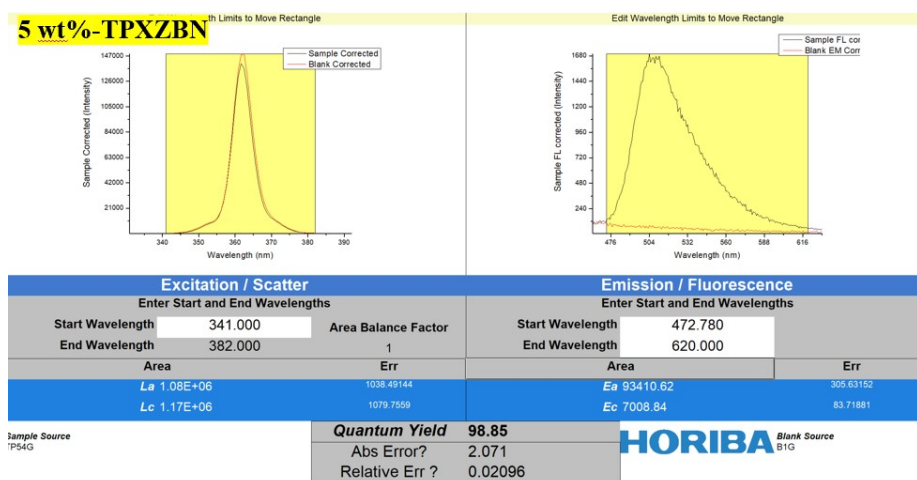

**Fig. S12** PLQYs of TPXZBN/DPXZCZBN in mCBP deposited films with 5 wt% doping concentration.

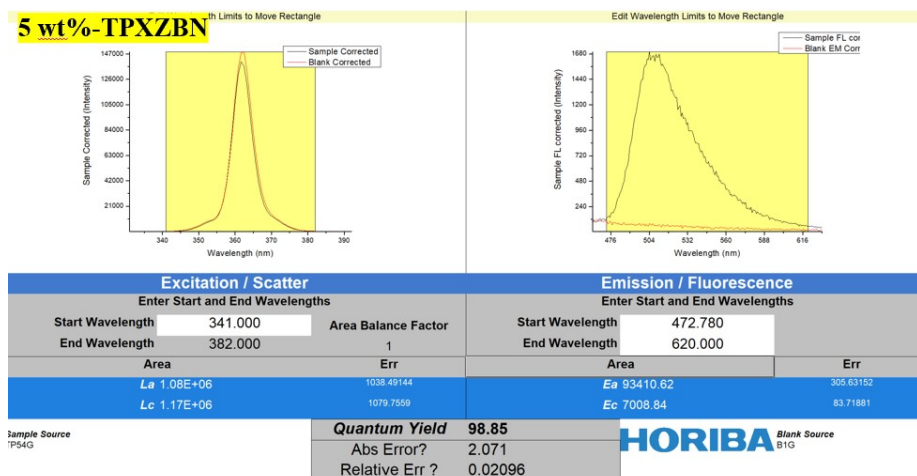

### 15 wt%-TPXZBN

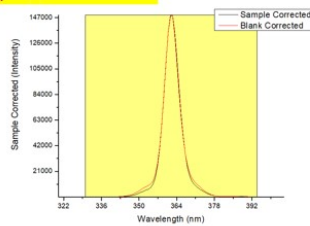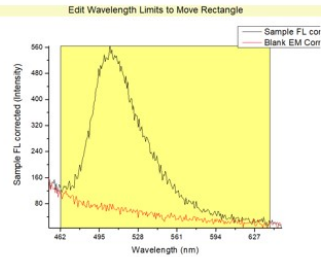

| Excitation / Scatter            |          |                     | Emission / Fluorescence         |                         |           |
|---------------------------------|----------|---------------------|---------------------------------|-------------------------|-----------|
| Enter Start and End Wavelengths |          |                     | Enter Start and End Wavelengths |                         |           |
| Start Wavelength                | 330.060  | Area Balance Factor | Start Wavelength                | 462.310                 |           |
| End Wavelength                  | 393.850  | 1                   | End Wavelength                  | 640.000                 |           |
| Area                            |          | Err                 | Area                            |                         | Err       |
| La                              | 1.14E+06 | 1068.10675          | Ea                              | 34083.15                | 184.61623 |
| Lc                              | 1.17E+06 | 1081.69179          | Ec                              | 8492.18                 | 92.15301  |
| Sample Source                   | TP159G   | Quantum Yield       | 87.63                           | HORIBA Blank Source B1G |           |
|                                 |          | Abs Error?          | 5.855                           |                         |           |
|                                 |          | Relative Err ?      | 0.06682                         |                         |           |

### 30 wt%-TPXZBN

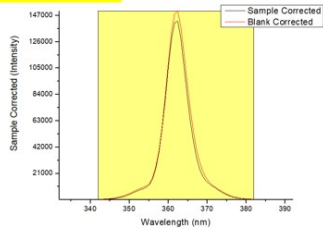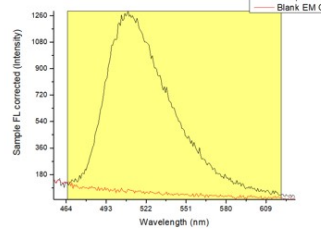

| Excitation / Scatter            |          |                     | Emission / Fluorescence         |                         |           |
|---------------------------------|----------|---------------------|---------------------------------|-------------------------|-----------|
| Enter Start and End Wavelengths |          |                     | Enter Start and End Wavelengths |                         |           |
| Start Wavelength                | 342.000  | Area Balance Factor | Start Wavelength                | 465.000                 |           |
| End Wavelength                  | 382.000  | 1                   | End Wavelength                  | 620.000                 |           |
| Area                            |          | Err                 | Area                            |                         | Err       |
| La                              | 1.11E+06 | 1054.98302          | Ea                              | 75886.34                | 275.47475 |
| Lc                              | 1.20E+06 | 1097.34104          | Ec                              | 8126.73                 | 90.14835  |
| Sample Source                   | TP305G   | Quantum Yield       | 73.64                           | HORIBA Blank Source B1G |           |
|                                 |          | Abs Error?          | 1.675                           |                         |           |
|                                 |          | Relative Err ?      | 0.02275                         |                         |           |

### 50 wt%-TPXZBN

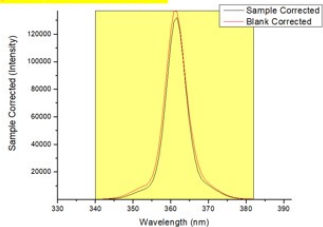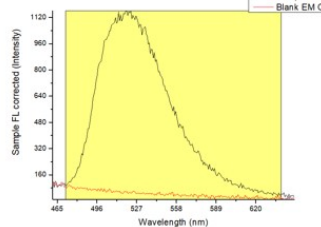

| Excitation / Scatter            |           |                     | Emission / Fluorescence         |                         |           |
|---------------------------------|-----------|---------------------|---------------------------------|-------------------------|-----------|
| Enter Start and End Wavelengths |           |                     | Enter Start and End Wavelengths |                         |           |
| Start Wavelength                | 340.000   | Area Balance Factor | Start Wavelength                | 471.470                 |           |
| End Wavelength                  | 382.000   | 1                   | End Wavelength                  | 640.000                 |           |
| Area                            |           | Err                 | Area                            |                         | Err       |
| La                              | 993739.30 | 996.86473           | Ea                              | 80098.44                | 283.01667 |
| Lc                              | 1.10E+06  | 1050.08006          | Ec                              | 7137.69                 | 84.48482  |
| Sample Source                   | TP505G    | Quantum Yield       | 66.98                           | HORIBA Blank Source B1G |           |
|                                 |           | Abs Error?          | 1.279                           |                         |           |
|                                 |           | Relative Err ?      | 0.0191                          |                         |           |



### 70 wt%-TPXZBN

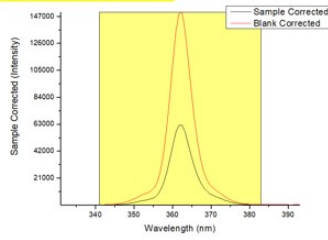

Edit Wavelength Limits to Move Rectangle

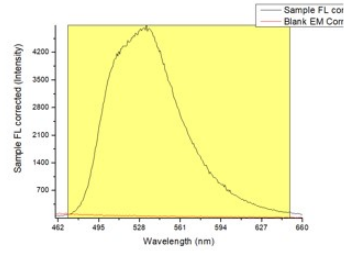

| Excitation / Scatter            |            | Emission / Fluorescence         |           |
|---------------------------------|------------|---------------------------------|-----------|
| Enter Start and End Wavelengths |            | Enter Start and End Wavelengths |           |
| Start Wavelength                | 341.000    | Area Balance Factor             | 1         |
| End Wavelength                  | 383.000    | Start Wavelength                | 470.000   |
| Area                            | 513963.41  | End Wavelength                  | 650.000   |
| Err                             | 716.91242  | Area                            | 355813.86 |
| La                              | 1.18E+06   | Err                             | 596.50135 |
| Lc                              | 1086.67112 | Ec                              | 7916.29   |
|                                 |            |                                 | 88.97356  |

Sample Source  
TP704G

**Quantum Yield** 52.34  
Abs Error? 0.149  
Relative Err ? 0.00285

**HORIBA** Blank Source  
B1G

### 90 wt%-TPXZBN

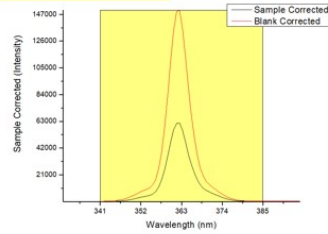

Edit Wavelength Limits to Move Rectangle

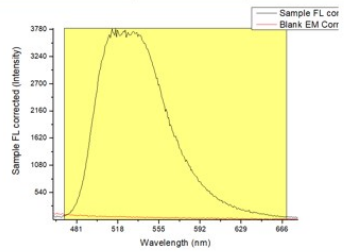

| Excitation / Scatter            |            | Emission / Fluorescence         |           |
|---------------------------------|------------|---------------------------------|-----------|
| Enter Start and End Wavelengths |            | Enter Start and End Wavelengths |           |
| Start Wavelength                | 341.000    | Area Balance Factor             | 1         |
| End Wavelength                  | 385.000    | Start Wavelength                | 470.000   |
| Area                            | 511239.87  | End Wavelength                  | 670.000   |
| Err                             | 715.0104   | Area                            | 294693.35 |
| La                              | 1.18E+06   | Err                             | 542.85665 |
| Lc                              | 1086.01535 | Ec                              | 8199.39   |
|                                 |            |                                 | 90.55049  |

Sample Source  
TP903G

**Quantum Yield** 42.88  
Abs Error? 0.136  
Relative Err ? 0.00318

**HORIBA** Blank Source  
B1G

### Pure film-TPXZBN

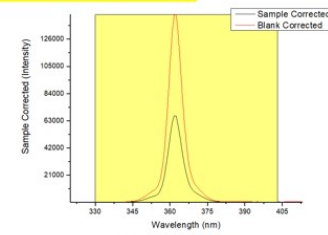

Edit Wavelength Limits to Move Rectangle

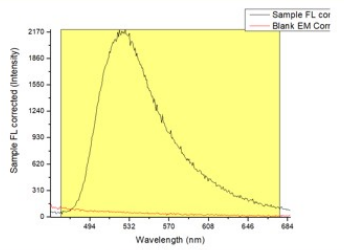

| Excitation / Scatter            |            | Emission / Fluorescence         |           |
|---------------------------------|------------|---------------------------------|-----------|
| Enter Start and End Wavelengths |            | Enter Start and End Wavelengths |           |
| Start Wavelength                | 330.060    | Area Balance Factor             | 1         |
| End Wavelength                  | 403.010    | Start Wavelength                | 466.420   |
| Area                            | 543487.01  | End Wavelength                  | 676.490   |
| Err                             | 737.21571  | Area                            | 172784.45 |
| La                              | 1.14E+06   | Err                             | 415.67349 |
| Lc                              | 1065.95047 | Ec                              | 8355.36   |
|                                 |            |                                 | 91.40764  |

Sample Source  
TPpure3G

**Quantum Yield** 27.74  
Abs Error? 0.139  
Relative Err ? 0.00502

**HORIBA** Blank Source  
B1G

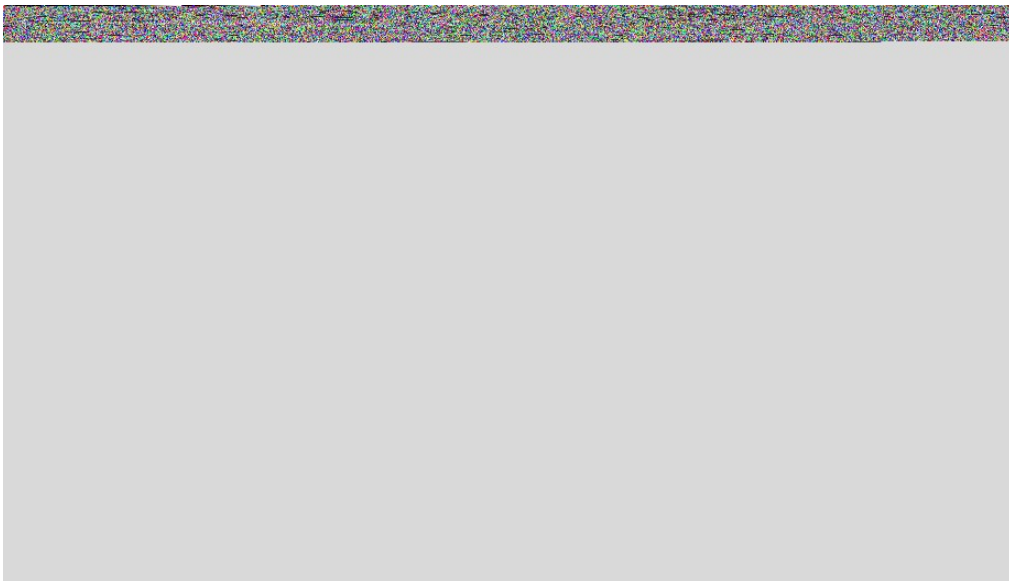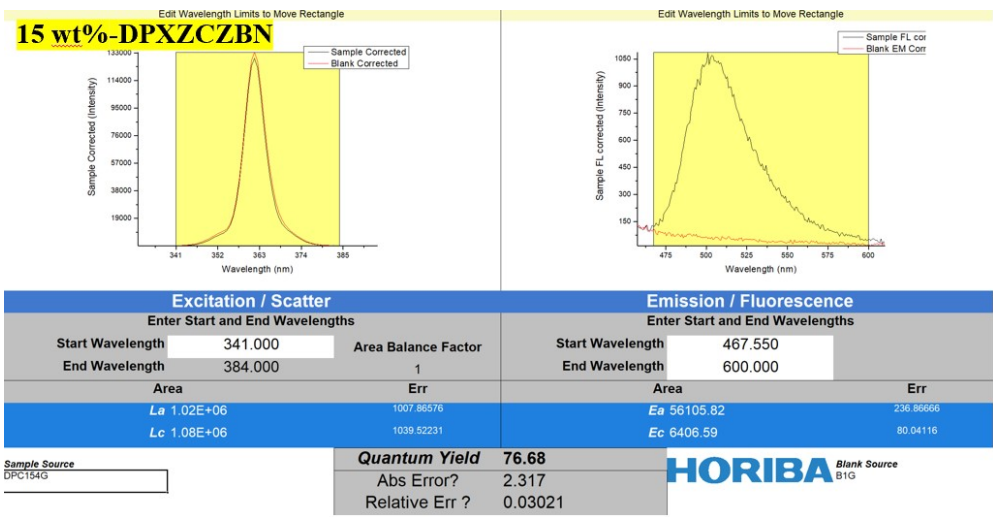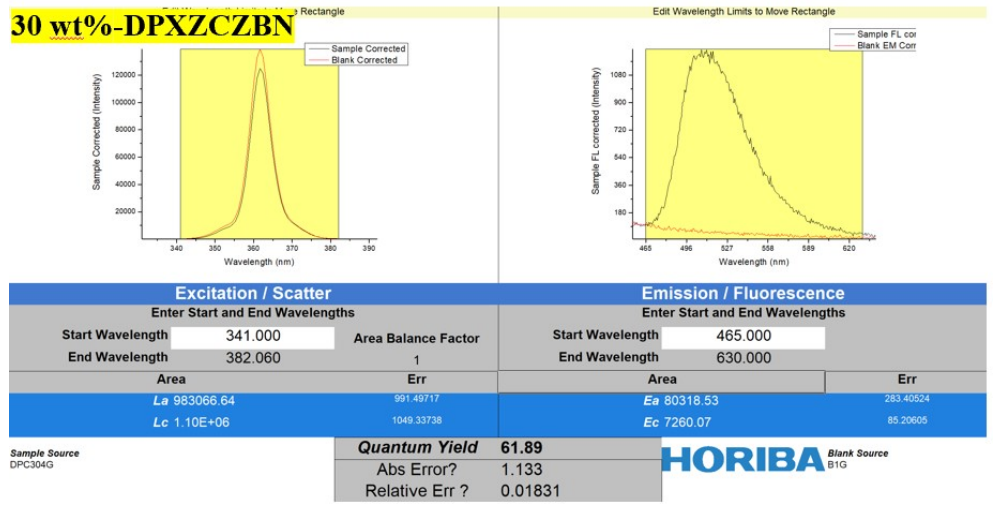

### 50 wt%-DPXZCZBN

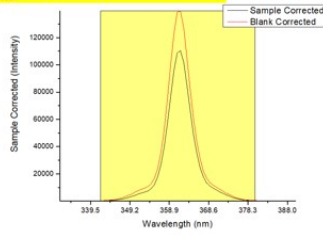

Edit Wavelength Limits to Move Rectangle

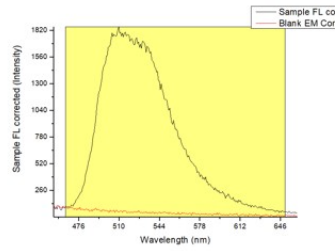

| Excitation / Scatter            |           | Emission / Fluorescence         |           |
|---------------------------------|-----------|---------------------------------|-----------|
| Enter Start and End Wavelengths |           | Enter Start and End Wavelengths |           |
| Start Wavelength                | 342.000   | Area Balance Factor             | 1         |
| End Wavelength                  | 380.000   | Start Wavelength                | 465.000   |
| Area                            | Err       | End Wavelength                  | 650.000   |
| La                              | 841067.69 | Area                            | Err       |
| Lc                              | 1.08E+06  | Ea                              | 134540.05 |
|                                 |           | Ec                              | 7434.40   |
|                                 |           |                                 | 368.79701 |
|                                 |           |                                 | 86.22296  |

Sample Source  
DPC504G

**Quantum Yield** 53.66  
Abs Error? 0.500  
Relative Err ? 0.00931

**HORIBA** Blank Source  
B1G

### 70 wt%-DPXZCZBN

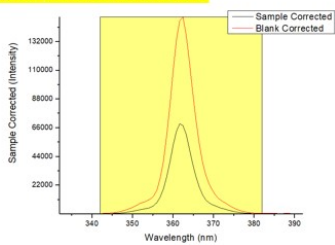

Edit Wavelength Limits to Move Rectangle

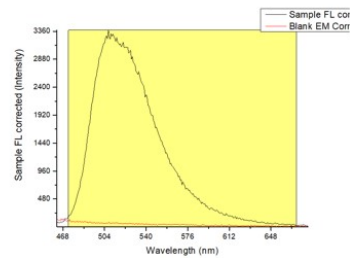

| Excitation / Scatter            |           | Emission / Fluorescence         |           |
|---------------------------------|-----------|---------------------------------|-----------|
| Enter Start and End Wavelengths |           | Enter Start and End Wavelengths |           |
| Start Wavelength                | 342.000   | Area Balance Factor             | 1         |
| End Wavelength                  | 382.000   | Start Wavelength                | 472.780   |
| Area                            | Err       | End Wavelength                  | 670.000   |
| La                              | 531647.63 | Area                            | Err       |
| Lc                              | 1.21E+06  | Ea                              | 220184.09 |
|                                 |           | Ec                              | 8386.06   |
|                                 |           |                                 | 469.23777 |
|                                 |           |                                 | 91.57545  |

Sample Source  
IPC705G

**Quantum Yield** 31.28  
Abs Error? 0.124  
Relative Err ? 0.00398

**HORIBA** Blank Source  
B1G

### 90 wt%-DPXZCZBN

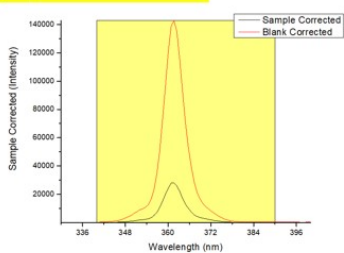

Edit Wavelength Limits to Move Rectangle

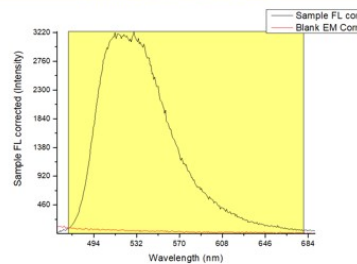

| Excitation / Scatter            |           | Emission / Fluorescence         |           |
|---------------------------------|-----------|---------------------------------|-----------|
| Enter Start and End Wavelengths |           | Enter Start and End Wavelengths |           |
| Start Wavelength                | 340.000   | Area Balance Factor             | 1         |
| End Wavelength                  | 390.000   | Start Wavelength                | 471.660   |
| Area                            | Err       | End Wavelength                  | 680.000   |
| La                              | 225688.04 | Area                            | Err       |
| Lc                              | 1.14E+06  | Ea                              | 252375.07 |
|                                 |           | Ec                              | 7891.36   |
|                                 |           |                                 | 502.36945 |
|                                 |           |                                 | 88.83331  |

Sample Source  
DPC506G

**Quantum Yield** 26.77  
Abs Error? 0.063  
Relative Err ? 0.00235

**HORIBA** Blank Source  
B1G

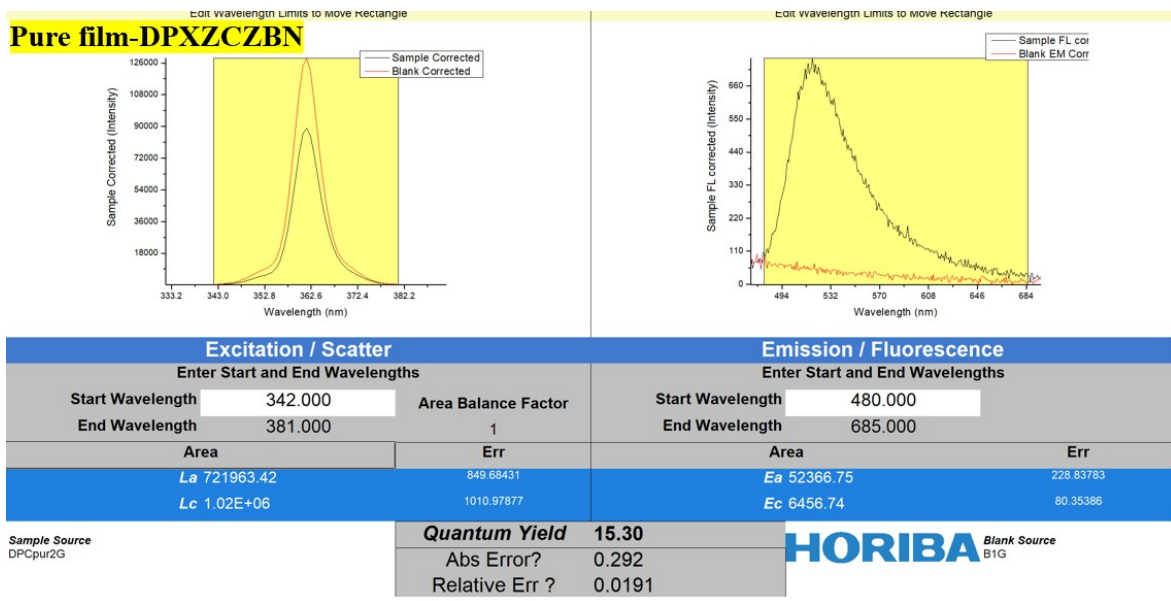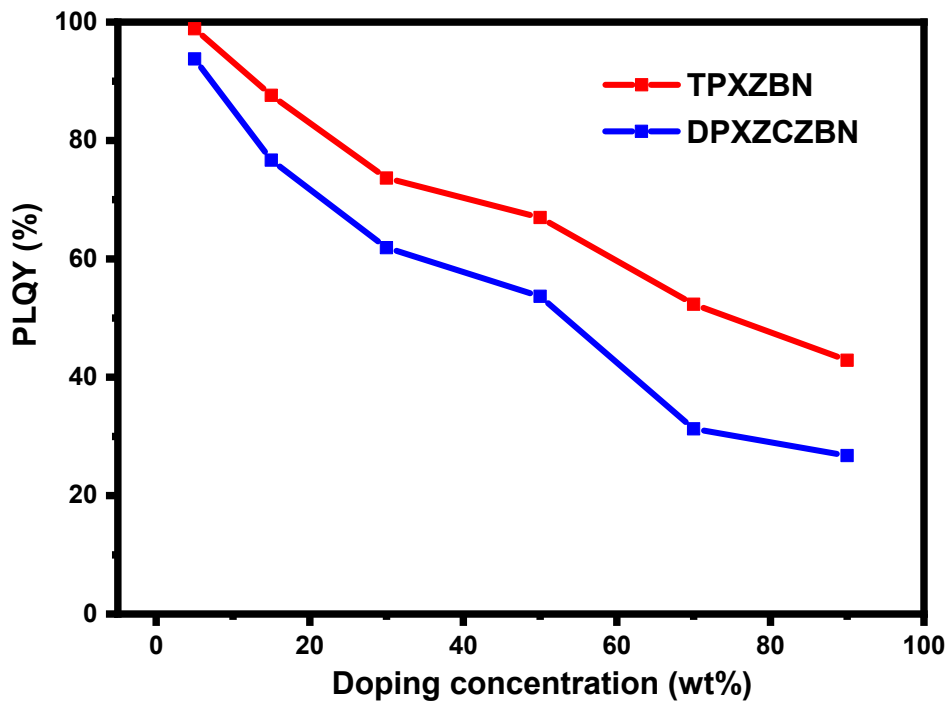

**Fig. S13** PLQYs of TPXZBN/DPXZCZBN in mCBP deposited films with different doping concentrations.

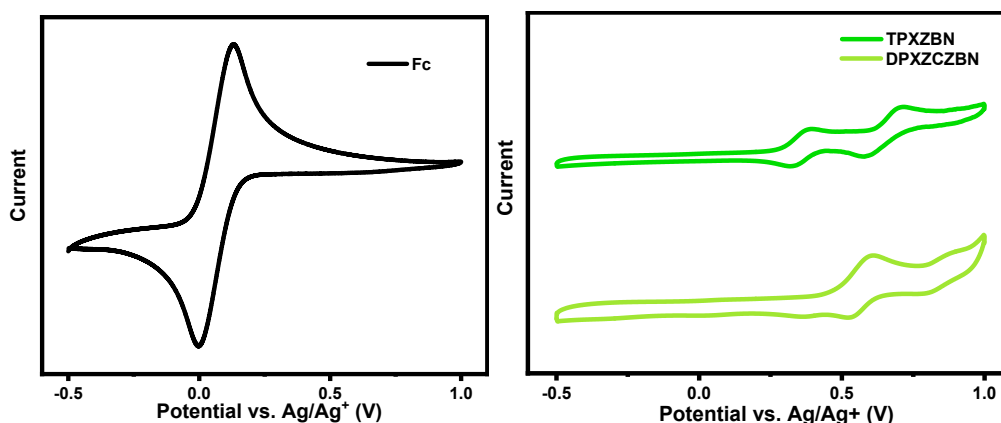

**Fig. S14** Cyclic voltammogram curves of TPXZBN and DPXZCZBN in  $\text{CH}_3\text{CN}$  solutions.

## 6. Computational detail and geometry data

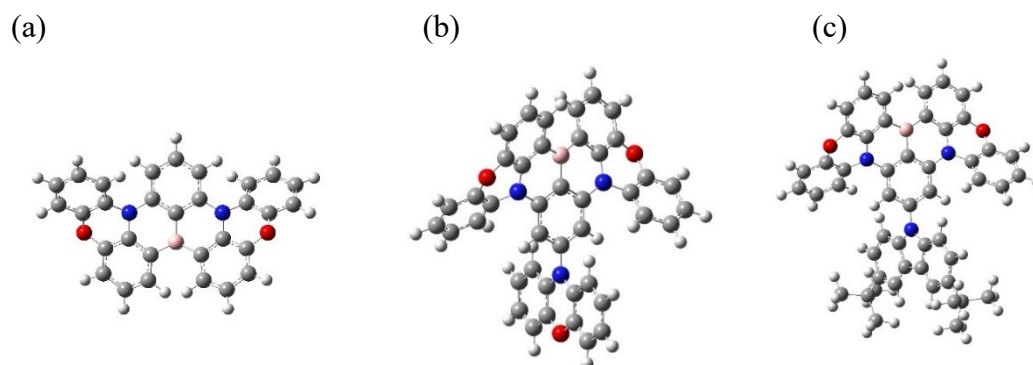

**Fig. S15** The optimized structures of (a) PXZ-BN, (b) TPXZBN and (c) DPXZCZBN compounds calculated at the B3LYP/6-31g(d) level of theory.

|          | LUMO+2       | LUMO+1       | LUMO         | HOMO         | HOMO-1       | HOMO-2       |
|----------|--------------|--------------|--------------|--------------|--------------|--------------|
| PXZ-BN   | <br>-0.29 eV | <br>0.61 eV  | <br>-1.54 eV | <br>-4.81 eV | <br>-5.27 eV | <br>-6.17 eV |
| TPXZBN   | <br>-0.46 eV | <br>-0.78 eV | <br>-1.69 eV | <br>-4.66 eV | <br>-4.95 eV | <br>-5.35 eV |
| DPXZCZBN | <br>-0.61 eV | <br>-0.71 eV | <br>-1.64 eV | <br>-4.91 eV | <br>-5.23 eV | <br>-5.33 eV |

**Fig. S16** Frontier molecular orbitals of several molecular structures calculated at the B3LYP/6-31g(d) level of theory.

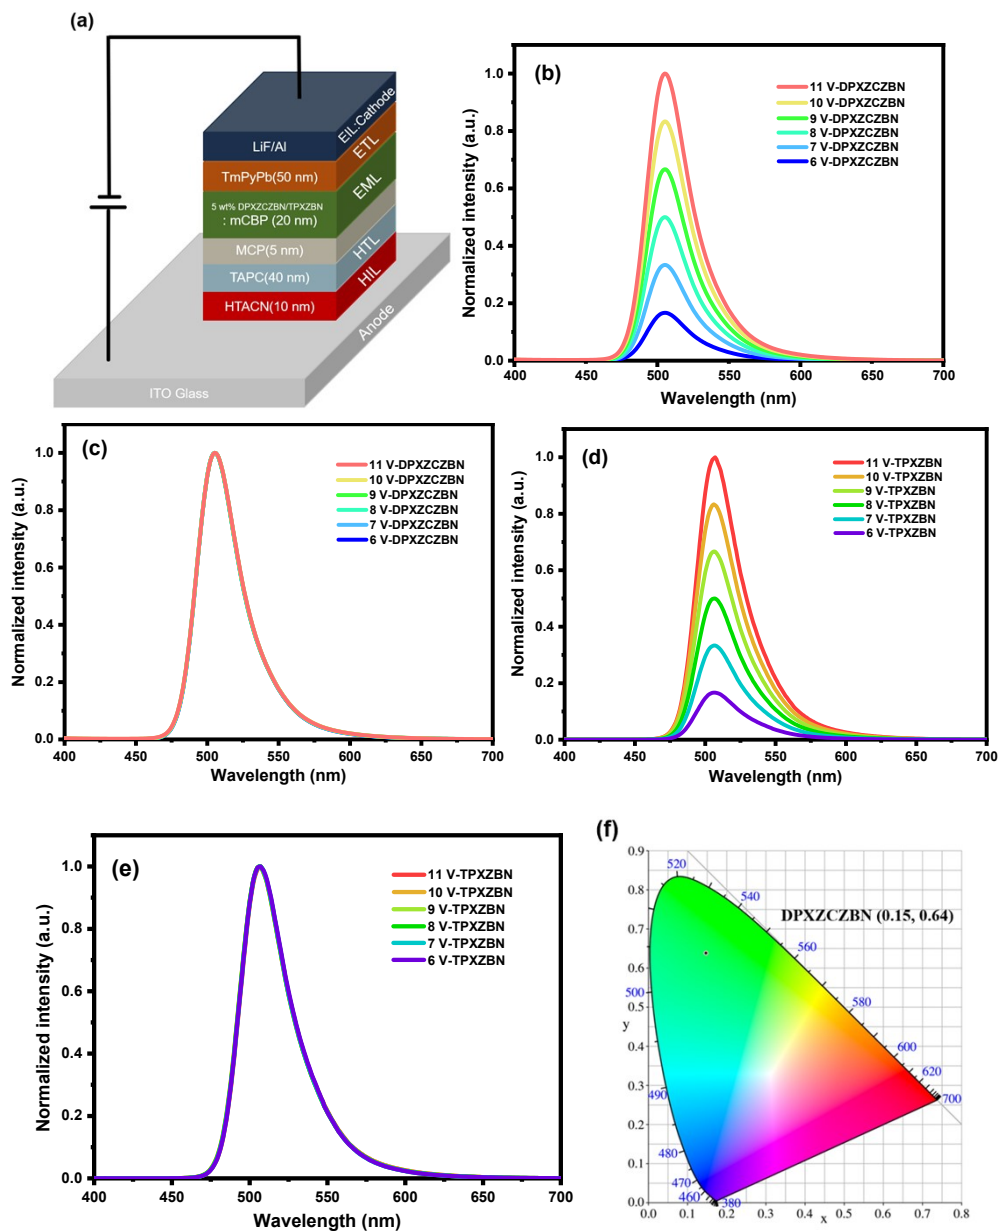

**Fig. S17** (a) The energy level diagram of the devices. (b)(c) Normalized EL spectra of DPXZCZBN-based device measured at various voltages. (d)(e) Normalized EL spectra of TPXZBN-based device measured at various voltages. (f) CIE (x, y) coordinates.

**Table S1** Cartesian coordinates of aforementioned complexes.

| PXZ-BN |          |          |          |
|--------|----------|----------|----------|
| Atom   | x        | y        | z        |
| C      | 0.00005  | 3.22266  | -0.00005 |
| C      | -1.21598 | 2.55023  | -0.08875 |
| C      | -1.22402 | 1.14772  | -0.05751 |
| C      | 0        | 0.42293  | -0.00002 |
| C      | 1.22405  | 1.14769  | 0.05746  |
| C      | 1.21605  | 2.55019  | 0.08868  |
| H      | 0.00007  | 4.30977  | -0.00006 |
| H      | -2.13544 | 3.1118   | -0.19522 |
| H      | 2.13553  | 3.11174  | 0.19512  |
| N      | 2.42958  | 0.42625  | 0.11188  |
| N      | -2.42957 | 0.42631  | -0.11194 |
| C      | 2.45496  | -0.92399 | 0.52332  |
| C      | 3.67007  | -1.42693 | 1.02357  |
| C      | 1.31301  | -1.7559  | 0.47245  |
| C      | 3.77362  | -2.73126 | 1.47493  |
| C      | 1.44235  | -3.07795 | 0.95743  |
| C      | 2.64488  | -3.5621  | 1.45098  |
| H      | 4.72687  | -3.07493 | 1.86467  |
| H      | 0.5653   | -3.71737 | 0.9694   |
| H      | 2.71914  | -4.57857 | 1.82664  |
| C      | 3.67712  | 0.95386  | -0.33857 |
| C      | 3.80525  | 1.9152   | -1.34871 |
| C      | 4.85015  | 0.41088  | 0.20782  |
| C      | 5.06499  | 2.38138  | -1.72831 |
| H      | 2.91849  | 2.30525  | -1.83349 |
| C      | 6.10822  | 0.86442  | -0.17187 |
| C      | 6.21789  | 1.87095  | -1.13148 |
| H      | 5.13744  | 3.14106  | -2.50107 |
| H      | 6.9827   | 0.41458  | 0.28777  |
| H      | 7.19857  | 2.23554  | -1.42229 |
| C      | -3.6771  | 0.9539   | 0.33859  |
| C      | -4.85013 | 0.41096  | -0.20783 |
| C      | -3.80521 | 1.91514  | 1.34882  |
| C      | -6.1082  | 0.86444  | 0.17194  |
| C      | -5.06496 | 2.38127  | 1.7285   |
| H      | -2.91845 | 2.30515  | 1.83363  |
| C      | -6.21786 | 1.87088  | 1.13165  |
| H      | -6.98269 | 0.41463  | -0.28772 |
| H      | -5.13739 | 3.14087  | 2.50134  |
| H      | -7.19853 | 2.23543  | 1.42252  |
| C      | -2.45497 | -0.92393 | -0.52337 |
| C      | -1.31306 | -1.75587 | -0.47248 |
| C      | -3.6701  | -1.42682 | -1.02363 |
| C      | -1.44244 | -3.07792 | -0.95744 |
| C      | -3.77369 | -2.73116 | -1.47496 |

|   |          |          |          |
|---|----------|----------|----------|
| C | -2.64498 | -3.56204 | -1.45098 |
| H | -0.56541 | -3.71737 | -0.9694  |
| H | -4.72695 | -3.07481 | -1.8647  |
| H | -2.71927 | -4.57851 | -1.82662 |
| O | -4.77923 | -0.60842 | -1.13232 |
| O | 4.77926  | -0.6086  | 1.1322   |
| B | -0.00002 | -1.0978  | -0.00001 |

| DPXZCZBN |             |             |             |
|----------|-------------|-------------|-------------|
| Atom     | x           | y           | z           |
| C        | 1.79844123  | -1.15410269 | -0.41196822 |
| C        | 2.52311988  | -0.00000864 | 0.00001492  |
| C        | 1.79844622  | 1.1540853   | 0.41200646  |
| C        | 0.39632183  | 1.14098799  | 0.43606516  |
| C        | -0.27907109 | -0.00000007 | 0.00001468  |
| C        | 0.39631606  | -1.1409938  | -0.43603026 |
| H        | -0.17443331 | 1.97642498  | 0.81921536  |
| H        | -0.17444485 | -1.97642244 | -0.81918873 |
| N        | 2.5184634   | 2.28407529  | 0.8326953   |
| N        | -1.70422771 | 0.00000545  | 0.00000873  |
| N        | 2.51845748  | -2.28409421 | -0.8326597  |
| C        | 1.98906019  | 3.61051911  | 0.79790623  |
| C        | 2.52397833  | 4.55140098  | 1.69085566  |
| C        | 1.03056825  | 4.04888351  | -0.12336122 |
| C        | 2.06122821  | 5.86169639  | 1.73137937  |
| C        | 0.5560228   | 5.36075413  | -0.08390258 |
| H        | 0.64784542  | 3.36265825  | -0.86855407 |
| C        | 1.0553348   | 6.26502491  | 0.85333669  |
| H        | 2.50399438  | 6.54626553  | 2.44798649  |
| H        | -0.2041548  | 5.67042612  | -0.79474797 |
| H        | 0.68302312  | 7.28439863  | 0.89005189  |
| C        | 3.86585174  | 2.17863128  | 1.24466499  |
| C        | 4.36379527  | 3.17834178  | 2.1002455   |
| C        | 4.69960745  | 1.10807475  | 0.84819222  |
| C        | 5.66634415  | 3.13630599  | 2.5676021   |
| C        | 6.01890373  | 1.07965974  | 1.35607797  |
| C        | 6.49912695  | 2.07123279  | 2.19865637  |
| H        | 6.00736714  | 3.92148893  | 3.23523876  |
| H        | 6.65814508  | 0.24002816  | 1.10220667  |
| H        | 7.51368748  | 2.02576312  | 2.58387506  |
| C        | 1.98906436  | -3.61054301 | -0.79786626 |
| C        | 2.52396545  | -4.55141486 | -1.69083707 |
| C        | 1.03060812  | -4.04892717 | 0.12342988  |
| C        | 2.06122002  | -5.8617121  | -1.73136214 |
| C        | 0.5560697   | -5.36080033 | 0.08397268  |
| H        | 0.64790872  | -3.36271567 | 0.86864672  |



|   |             |             |             |
|---|-------------|-------------|-------------|
| C | 1.05535518  | -6.26505651 | -0.85329447 |
| H | 2.50397091  | -6.54627204 | -2.44798756 |
| H | -0.20408062 | -5.67048581 | 0.79484129  |
| H | 0.683049    | -7.28443218 | -0.89000985 |
| C | 3.86583527  | -2.17864057 | -1.24466185 |
| C | 4.69959359  | -1.10807978 | -0.84820608 |
| C | 4.36376488  | -3.17834203 | -2.10026101 |
| C | 6.01887605  | -1.07965047 | -1.35612676 |
| C | 5.66630033  | -3.13629144 | -2.56765396 |
| C | 6.49908462  | -2.07121374 | -2.19872483 |
| H | 6.65811667  | -0.24001467 | -1.10226746 |
| H | 6.00731168  | -3.92146778 | -3.23530431 |
| H | 7.51363403  | -2.02573339 | -2.58397141 |
| C | -2.52481849 | -0.81068657 | 0.78989766  |
| C | -3.88018884 | -0.51860608 | 0.50662808  |
| C | -2.18504266 | -1.75756337 | 1.75918988  |
| C | -4.89811369 | -1.19949599 | 1.18944469  |
| C | -3.21854608 | -2.41447535 | 2.41889101  |
| H | -1.1490145  | -1.96899115 | 2.0041441   |
| C | -4.58651217 | -2.16110334 | 2.15390954  |
| H | -5.93141771 | -0.96374559 | 0.95955913  |
| H | -2.95101371 | -3.1497443  | 3.17236039  |
| C | -2.52480587 | 0.81070513  | -0.78988563 |
| C | -2.18501519 | 1.75757278  | -1.75918147 |
| C | -3.88018081 | 0.51864166  | -0.50661991 |
| C | -3.21850845 | 2.41448376  | -2.41889961 |
| H | -1.14898347 | 1.96899075  | -2.00412924 |
| C | -4.89809506 | 1.199538    | -1.18944575 |
| C | -4.58647847 | 2.16112416  | -2.15392682 |
| H | -2.95096459 | 3.14974851  | -3.17236898 |
| H | -5.9314029  | 0.96379636  | -0.95956775 |
| O | 3.54492708  | 4.19843932  | 2.54574242  |
| O | 3.54489824  | -4.19844804 | -2.54573874 |
| B | 4.04360589  | -0.00000704 | 0.00000392  |
| C | -5.66522113 | -2.93949317 | 2.93306857  |
| C | -7.09219928 | -2.53723085 | 2.51665414  |
| C | -5.50105114 | -4.45556428 | 2.67267465  |
| C | -5.5131339  | -2.66446141 | 4.44782323  |
| H | -7.29195216 | -1.47646554 | 2.70820126  |
| H | -7.28033407 | -2.73398928 | 1.4547131   |
| H | -7.82376053 | -3.11700129 | 3.09176129  |
| H | -4.51985771 | -4.82346714 | 2.99236708  |
| H | -6.26194235 | -5.02443641 | 3.2220005   |
| H | -5.61162733 | -4.68675964 | 1.60653731  |
| H | -6.27546574 | -3.21235074 | 5.01617182  |
| H | -4.53313095 | -2.97582739 | 4.82572205  |
| H | -5.63039428 | -1.5968782  | 4.66843397  |
| C | -5.66517604 | 2.93951195  | -2.93310308 |

|   |             |            |             |
|---|-------------|------------|-------------|
| C | -5.51332652 | 2.66415975 | -4.44782375 |
| C | -7.09215737 | 2.53753097 | -2.51642855 |
| C | -5.50075353 | 4.45561039 | -2.67302769 |
| H | -4.53333617 | 2.975322   | -4.82592187 |
| H | -5.63075703 | 1.59654788 | -4.66820555 |
| H | -6.27566476 | 3.21203435 | -5.01617791 |
| H | -7.280155   | 2.73459217 | -1.45451956 |
| H | -7.82371116 | 3.11723809 | -3.09160907 |
| H | -7.29205704 | 1.47673863 | -2.70767375 |
| H | -6.26162432 | 5.02448696 | -3.22237727 |
| H | -5.61116927 | 4.68703271 | -1.606923   |
| H | -4.5195412  | 4.82330005 | -2.99290855 |

| TPXZBN |             |             |             |
|--------|-------------|-------------|-------------|
| Atom   | x           | y           | z           |
| C      | -0.63390359 | 1.22469968  | -0.05489387 |
| C      | -1.35804591 | 0.00035586  | -0.00000549 |
| C      | -0.63466292 | -1.22443405 | 0.05485209  |
| C      | 0.76843957  | -1.21806103 | 0.08203595  |
| C      | 1.44271616  | -0.00051638 | -0.00001706 |
| C      | 0.76919442  | 1.21744782  | -0.08209471 |
| H      | 1.34091427  | -2.13024488 | 0.18611544  |
| H      | 1.34224178  | 2.12927119  | -0.18617863 |
| N      | -1.3529659  | -2.42827528 | 0.11361551  |
| N      | 2.87825908  | -0.00094827 | 0.00001612  |
| N      | -1.35146205 | 2.42898557  | -0.11364472 |
| C      | -0.81859439 | -3.68090619 | -0.31942274 |
| C      | -1.36010907 | -4.84867628 | 0.23889452  |
| C      | 0.14832551  | -3.81763619 | -1.32298238 |
| C      | -0.8988107  | -6.10956894 | -0.12161138 |
| C      | 0.62234961  | -5.08001381 | -1.68316065 |
| H      | 0.53952415  | -2.93745291 | -1.81861084 |
| C      | 0.113462    | -6.22694897 | -1.07387023 |
| H      | -1.34722399 | -6.97989221 | 0.34710458  |
| H      | 1.38776915  | -5.15854241 | -2.44938606 |
| H      | 0.48455385  | -7.20959768 | -1.34918005 |
| C      | -2.70297713 | -2.45257952 | 0.52881565  |
| C      | -3.20348007 | -3.66479769 | 1.03839102  |
| C      | -3.53572996 | -1.31130527 | 0.47446929  |
| C      | -4.5072977  | -3.76590396 | 1.49247808  |
| C      | -4.85715339 | -1.43843502 | 0.96159497  |
| C      | -5.33945379 | -2.63860772 | 1.462297    |
| H      | -4.84929571 | -4.71680948 | 1.88924972  |
| H      | -5.4968464  | -0.56163444 | 0.96999598  |
| H      | -6.35533489 | -2.71180358 | 1.83956868  |
| C      | -0.8162588  | 3.68130352  | 0.3192762   |
| C      | -1.35711037 | 4.84939017  | -0.23902099 |
| C      | 0.15082894  | 3.81746321  | 1.32275029  |

|   |             |             |             |
|---|-------------|-------------|-------------|
| C | -0.89497836 | 6.11000725  | 0.12138283  |
| C | 0.62567489  | 5.07955639  | 1.68284118  |
| H | 0.54149663  | 2.93704446  | 1.81838646  |
| C | 0.11746386  | 6.22678593  | 1.07353488  |
| H | -1.34289376 | 6.98059485  | -0.34732032 |
| H | 1.39120001  | 5.15763521  | 2.44900722  |
| H | 0.48920804  | 7.20921297  | 1.34875621  |
| C | -2.70149613 | 2.45412124  | -0.52874964 |
| C | -3.53494213 | 1.31335718  | -0.47434954 |
| C | -3.20128063 | 3.6666277   | -1.03834319 |
| C | -4.85630374 | 1.44126971  | -0.96143885 |
| C | -4.50505259 | 3.76851176  | -1.49238961 |
| C | -5.33788976 | 2.64172038  | -1.4621638  |
| H | -5.49653334 | 0.56486006  | -0.96977732 |
| H | -4.84648409 | 4.71961591  | -1.88917413 |
| H | -6.35374063 | 2.71552791  | -1.83939784 |
| C | 3.58858809  | 0.04047079  | 1.21493602  |
| C | 4.99655366  | 0.04145753  | 1.18622831  |
| C | 2.95612977  | 0.07641757  | 2.46305768  |
| C | 5.73875031  | 0.08306488  | 2.35758261  |
| C | 3.70389187  | 0.11751952  | 3.64472191  |
| H | 1.87307659  | 0.0642659   | 2.51016699  |
| C | 5.09423308  | 0.1223484   | 3.59877121  |
| H | 6.82179521  | 0.08267753  | 2.27978917  |
| H | 3.18415238  | 0.14352656  | 4.59830867  |
| C | 3.58864967  | -0.04259296 | -1.21485448 |
| C | 2.95625347  | -0.07826177 | -2.463012   |
| C | 4.99661296  | -0.04409436 | -1.18605939 |
| C | 3.70406913  | -0.11960487 | -3.64463487 |
| H | 1.8732079   | -0.06569361 | -2.5101857  |
| C | 5.73886371  | -0.08597042 | -2.3573701  |
| C | 5.09440511  | -0.12496104 | -3.59859959 |
| H | 3.18437684  | -0.14541308 | -4.59825316 |
| H | 6.82190427  | -0.08599049 | -2.27951255 |
| O | -2.38568339 | -4.77214817 | 1.15571337  |
| O | -2.38283346 | 4.77348457  | -1.15571703 |
| B | -2.87977216 | 0.00083628  | 0.00007719  |
| H | 5.68125869  | 0.15410055  | 4.51169938  |
| H | 5.68147301  | -0.15690653 | -4.51149398 |
| O | 5.70260369  | -0.00145988 | 0.00010678  |

Table S2 The chemical structures and energy gaps of PXZ-BN, DPXZCZBN and TPXZBN.

|                   | PXZ-BN                                                                            | TPXZBN                                                                             | DPXZCZBN                                                                            |
|-------------------|-----------------------------------------------------------------------------------|------------------------------------------------------------------------------------|-------------------------------------------------------------------------------------|
| Structure         | 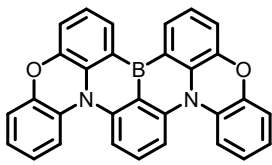 |  |  |
| $E_{\text{HOMO}}$ | -4.81 eV                                                                          | -4.66 eV                                                                           | -4.91 eV                                                                            |
| $E_{\text{LUMO}}$ | -1.54 eV                                                                          | -1.69 eV                                                                           | -1.64 eV                                                                            |
| $E_{\text{gap}}$  | 3.27 eV                                                                           | 2.97 eV                                                                            | 3.27 eV                                                                             |

Table S3 The photophysical properties of the reported PXZ-BN/2PXZBN materials and TPXZBN / DPXZCZBN compounds investigated in this work.

| Emitter                                                                                         | $\lambda_{\text{em}}$<br>[nm] | $\lambda_{\text{ph}}$<br>[nm] | FWHM<br>[nm] | PLQY<br>[%] | $\tau_{\text{PF}}$<br>[ns] | $\tau_{\text{DF}}$<br>[ $\mu\text{s}$ ] | $\text{EQE}_{\text{max}/100/1000}$<br>(%) | FWHM<br>[nm] |
|-------------------------------------------------------------------------------------------------|-------------------------------|-------------------------------|--------------|-------------|----------------------------|-----------------------------------------|-------------------------------------------|--------------|
| 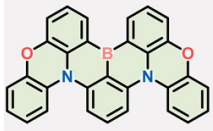<br>PXZ-BN   | 502                           | 540                           | 38           | 90          | 8.2                        | 90.7                                    | 23.3/19.9/11.3                            | 47           |
| <br>2PXZBN   | 504                           | -                             | 34           | 84          | 6.8                        | 25.3                                    | 17.7/15.3/7.4                             | 60           |
| <br>TPXZBN   | 502                           | 537                           | 33           | 94          | 7.4                        | 27.1                                    | 21.3/19.6/17.4                            | 37           |
| <br>DPXZCZBN | 500                           | 527                           | 32           | 99          | 10.0                       | 15.0                                    | 19.2/18.8/17.2                            | 36           |
